# Supplementary material for: Slovak morphological tokenizer using the Byte-Pair Encoding algorithm
Source: PeerJ journal article supplement (doi:10.7717/peerj-cs.2465), 2024-11-19
Supplement: SuppFiles.zip [file kinit_golden_accomodation.xlsx]

## Sheet:  Sheet1
text	labels	label_texts
Špinavé koberce, špinavý gauč, katastrofa.	-1	Negative
Bazén nič moc, vonkajšie bazény katastrofa.	-1	Negative
Rodinná izba mezonetová priestorovo pekná, ale špinavá, sami sme si museli vydrhnúť gauč :-(.	-1	Negative
Čo nám najviac vadilo, boli koberce na chodbách, neskutočne špinavé a zapáchajúce.	-1	Negative
Riešenie problému na recepcii vo mne zanechalo nepríjemné pocity.	-1	Negative
Nakoniec som to pochopiteľne zaplatila, ale správanie a prístup personálu vo mne zanechal trpkú pachuť z celého víkendu.	-1	Negative
Malý výber a neprimerané ceny za poskytnuté služby.	-1	Negative
Chuťovo - žiadny gurmánsky zážitok.	-1	Negative
Izby by mohli byť krajšie.	-1	Negative
niektorí časníci dosť otravní, veľa sa zdržujú u hostí a pozerajú sa do taniera.	-1	Negative
Spomínaný penzión Atrium, ktorý sa nachádza priamo v centre mesta Prešov, je hrozný.	-1	Negative
Izby v dezolatnom stave, kúpeľni rozbité, spanie na rozťahovacom gauči.	-1	Negative
Najhoršie na tom bolo, že sme sa skoro vôbec nevyspali, nakoľko tam klasické postele neboli, a pred koncom skončenia ubytovania nám naservírovali plesnivú štrúdlu, či dokonca cibuľový banán	-1	Negative
Absolútne neodporúčam, prílišná skúsenosť, spokojnosť žiadna. :(	-1	Negative
Na svojej internetovej stránke ma obsiahnuté neaktuálne informácie o poskytovaných službách ako sú - strava, vybavenie izieb, čistota.	-1	Negative
Mínus - neschopnosť personálu komunikovať a vybaviť základné požiadavky	-1	Negative
Strava obmedzená, nie je možný akýkoľvek výber z jedál na večeru, varieta výberu na raňajky je chudobná, jedlo sa nedokladá.	-1	Negative
Izba príliš malá, nemá chladničku.	-1	Negative
Pekný hotel, ale nulový záujem o zákazníka, počas celého pobytu ani raz nenavštívila izbu chyžná, ani raz neboli vynesené smeti.	-1	Negative
Dohodnutá cena potvrdená emailom sa nezhodovala so skutočnou, realizovanou pri platbe v penzióne, arogantné správanie prevádzkovej pracovníčky a majiteľov penziónu, raňajky vo forme švédskych stolov neboli realizované, neexistuje cenník, nechutná strava.	-1	Negative
Neochota personálu a strava strašná. Majiteľ sa sťažoval na zľavovom portáli, ale myslím si, že do tohto penziónu ľudí dostane jedine nízka cena a nie recenzie. Nad týmto by sa mal pán majiteľ zamyslieť predtým, než sa začne sťažovať.	-1	Negative
Neochota personálu aj majiteľa.	-1	Negative
Taspali v roku 94... veľmi zlá strava, na zľavovom kupóne uvádzali, vstup do baru Anakonda, ktorý už neexistuje, papierové steny, cez ktoré počuť každé slovo odviedla.. výhoda je blízko k aquaparku..., ale určite by som do budúcnosti volila iný hotel.	-1	Negative
Na chodbách divný puch, wifi v záujme ušetrenia času a nervov radšej neskúšať	-1	Negative
stiesnené izby, predražené ceny stravného vzhľadom na objem a výber jedla, nedostatok parkovacích miest, v prípade prebiehajúcej akcie v salóniku na prízemí sa na druhom poschodí príliš nevyspíte,	-1	Negative
Pred dvoma rokmi bolo v hotelových reštauráciách dosť zlé jedlo a aj nie všetok personal bol ústretový.	-1	Negative
Z pobytu zakúpeného cez kupón sme boli s priateľom sklamaní.	-1	Negative
Najprv sme zistili, že nám pridelili izbu s oddelenými posteľami, ktorú nám neboli ochotní vymeniť, hoci bolo zrejmé, že hotel nebol plne obsadený. Strava bola priemerná	-1	Negative
Zbytočne im tá pani kazí úroveň hotela.	-1	Negative
Prvé rozčarovanie prišlo, keď sa odporne ku mne zachovala – že mám objednanú procedúru, o ktorej ona nevedela, druhé bolo, keď po telefonickej hádke s recepčnou mi vyhodila na oči, že ona odkiaľ má vedieť, že ponúkajú moju procedúru do pobytového balíčka (mala som ju týždne mailom objednanou) a tretím bol nepríjemný zážitok pri parafangu, keď mi popálil chrbát.	-1	Negative
Škoda, že kvôli tejto pani budem na Grand hotel Bellevue spomínať, ako na jednu z najhorších dovoleniek na Slovensku.	-1	Negative
Hotel je slabo označený a cesta k nemu veľmi problematická. Dostupnosť do Prahy zložitá	-1	Negative
Izba nás sklamala, bola síce menšia, čo by nevadilo, ale strešné okno sa nedalo otvárať, kondenz z neho steká rovno na posteľ.	-1	Negative
Izba podkrovná maličká, úplne nevetrateľná, čo značne ovplyvnilo komfort na izbe.	-1	Negative
malého bazénika nefungoval ani hríbik ani tryska zo steny a bojový hrad pre deti, ktorý prezentujú aj na stránke, je úplne mimo prevádzky, zhrdzavený, podľa plavčíka sa bude rozoberať. Pre syna, ktorý bol s nami na pobyte, to bolo veľkým sklamaním.	-1	Negative
Pri polpenzii, ktorú sme mali k dispozícii, musím hodnotiť raňajky ako úbohé, na výber studený tanier, resp. vajíčka na nejaký spôsob, porcia malá, obloha takmer žiadna.	-1	Negative
Sauny nie všetky funkčné miesta osadené... málo miesta a stiesnené priestory na relaxáciu	-1	Negative
úctovanie za uteráky, špínavé šatne a sprchy, udierajúci nepríjemný smrad z nečistených záchodov, špinavé vírivky, hluk bratislavského hip-hopu a techno hudby z fitness miestnosti, spoločne satne pri bazéne, nepríjemný personál, ktorý keď o niečo slušne požiada.	-1	Negative
Personal je drzý a buzeračný. Hneď pri vchode vás privíta niekoľko odkazov na A4 papieroch čo všetko "musíte" a "nesmiete".	-1	Negative
Wellness je jedna obrovská tragédia mastná voda v bazéne, hlavne že si musíte dať na hlavu kúpaciu čiapku	-1	Negative
Kúpeľňa bola rovnako malá, ale so sprchovacím kútom, ktorý pôsobil temne a pripomenul mi internátne časy. Pri vstupe do wellness prišiel ďalší šok.	-1	Negative
V izbe neskutočné teplo bez klímy. Už nikdy sa tam nevratím. Škoda. mohli z toho mať útulný penzión.	-1	Negative
Tento detail by mohli vylepšiť, zbytočne to kazí dobrý dojem.	-1	Negative
Čo ma nepotešilo, žiadala som vopred izbu s bezproblémovým wifi pripojením, ktoré by malo byť v celom objekte k dispozícii, ale bohužiaľ, signál bol veľmi problémový, miestami žiadny.	-1	Negative
Priestorovo a vybavením OK.	0	Neutral
Boli sme individuálne na dovolenke v penzióne Panda v Turčianskych Tepliciach.	0	Neutral
Boli sme na víkendový pobyt cez zľavový portál. Kupón bol pre 2 osoby, ale chceli sme ísť aj s 2 deťmi.	0	Neutral
konzumovali sme len raňajky	0	Neutral
penzión v tichej lokalite Panenskej ulice	0	Neutral
Keďže sme boli mimo sezóny, tak nás bolo veľmi málo na hoteli.	0	Neutral
Ochotný, milý personál.	1	Positive
Hotel v krásnom prostredí, uprostred prírody, priamo pod lyžiarskym vlekom.	1	Positive
Hotel je celkovo luxusný a poskytuje pohodlie a príjemný zážitok v krásnom prostredí.	1	Positive
Izby pekné a čisté, príjemne zariadené.	1	Positive
Kúpeľňa bola fantastická.	1	Positive
Luxusný hotel dýchal históriou, eleganciou, mramorom, kryštálom, drevom a úchvatným výhľadom na scenériu Tatier.	1	Positive
Služby na vysokej úrovni.	1	Positive
Pobyt v Grand Hoteli Kempinski nepatril k najlacnejším, ale očaril nás svojim pôsobivým vzhľadom a obohatil nezabudnuteľnými zážitkami na celý život.	1	Positive
Personál nevtieravý, ale starostlivo úslužný.	1	Positive
Hotel vo všetkom naplnil naše túžby a očakávania, už len budova sama o sebe so svojou históriou je neskutočná.	1	Positive
Hotel je všetko, len nie nudný... Splní, čo vám na očiach uvidí.	1	Positive
Personál je veľmi milý a ochotný vždy pomôcť.	1	Positive
Nechýba im úsmev na tvári, čím sa tam cítite veľmi dobre. :) Izby sú veľké a vždy upratané, musíme pochváliť chyžné.	1	Positive
Najviac sa mi páči poloha hotela. Je v nádhernom prostredí Slovenska a je krásne vidieť na Štrbské pleso – pýchu Vysokých Tatier, čo sa ples týka. :)	1	Positive
Veľmi útulný a malebný hotel so správnym personálom a obsluhou v reštaurácii.	1	Positive
Ubytovanie príjemné, pracovníci recepcie veľmi ochotní a pružní. Raňajky a večere výborné, kuchár excelentný.	1	Positive
Výhodná poloha hotela, blízko vlakovej stanice. Určite sa tam vrátime.	1	Positive
Veľmi príjemný personál, Jedlo bolo kvalitné	1	Positive
Nemali sme problém s ničím, parkovisko bez problémov, prišli nás navštíviť aj známy a nebol s tým vôbec problém.	1	Positive
Penzión útulný, izby veľmi pekné a čisté, smeti každé ráno vysypané. Personál ústretový a milý.	1	Positive
Inak hotel je veľmi pekný, výhodou je blízkosť k lanovkám alebo k stanici.	1	Positive
Boli sme veľmi spokojní. Milá kuchárka Jarka, naozaj skvelá osoba a aj majitelia. Strava veľmi chutí. Izby krásne.	1	Positive
pozitívom je cena za ubytovanie a umiestnenie v blízkosti centra.	1	Positive
Hotel sme si našli cez pobytovú agentúru a prekvapila nás aj priaznivejšia cena ako v samotnom hoteli.	1	Positive
Rovnako celý hotel pôsobí síce frekventovaným, ale veľmi udržiavaným a starostlivým dojmom.	1	Positive
Wellness nám vynahradil daždivé jesenné počasie a zrušenú turistiku, deťom sa páčil detský kútik. Strava aj služby boli na jedničku.	1	Positive
Ponúkané služby hotela na vysokej úrovni, izba veľká vhodná aj pre rodiny s deťmi, strava pestrá, wellness služby boli na veľmi dobrej úrovni. Veľmi príjemný a ochotný personál.	1	Positive
Tentokrát na jedničku všetko. Hoci to bol pracovný pobyt, aj sme si oddýchli.	1	Positive
Samozrejme cena hotela zodpovedá kvalite, takže si človek aj za služby priplatí, ale inak chválim.	1	Positive
Vysoké Tatry a turistika alebo lyžovačka nikdy nesklame. V blízkosti aquapark.	1	Positive
Najviac sa mi páčilo to prostredie. Skvelé miesto na školenia a podobné stretnutia. Strava bola tiež výborná.	1	Positive
A čo sa týka wellness, to bola pre nás úplná bomba. Po školení sme si to veľmi užili. Tiež chválim profesionalitu pracovníkov hotela.	1	Positive
Príjemná slečna na recepcii nám už pri rezervácii odporučila rodinný apartmán. Neľutujeme tento príplatok za neho, pretože sme mali s manželom súkromie a deti sa hašterili akurát o hornú posteľ.	1	Positive
Manžel si pochvaľoval aj fitness a jeho vybavenosť.	1	Positive
Kupón bol len s raňajkami, ale stálo to za to lebo sme si mohli vyberať z ponuky jedálneho lístka a mali sme „nebíčko v tlamičke“.	1	Positive
Rodinný apartmán plne vyhovoval našim potrebám. Z návštevy na izbe u iných hostí, ktorí boli na dvojke s manželskou posteľou môžem podotknúť len toľko, že izba je síce menšia, ale pre pár na romantický pobyt úplne stačí.	1	Positive
Boli sme tam ubytovaní 3 dni, ale nemôžem sa sťahovať, personál milý, bazén neskutočný, vírivky tiež, celkovo veľmi dobrá atmosféra, tak rodinná, pre deti ako stvorené.	1	Positive
Personál nám tvrdil, že je tu nový majiteľ a novo je to geniálne. S tým musíme plne súhlasiť, pretože jedlo, obsluha, ochota prevádzkovateľa aj majiteľa reštaurácie bola na veľmi vysokej úrovni.	1	Positive
Kladný bod by som dala aspoň milým a ochotným čašníčkam.	1	Positive
