# Supplementary material for: Slovak morphological tokenizer using the Byte-Pair Encoding algorithm
Source: PeerJ journal article supplement (doi:10.7717/peerj-cs.2465), 2024-11-19
Supplement: SuppFiles.zip [file kinit_golden_accomodation.xlsx]

## Sheet:  Sheet1
text	labels	label_texts
Dirty carpets, dirty couch, disaster.	-1	Negative
Pool not much, outdoor pools a disaster.	-1	Negative
The duplex family room is spatially nice, but dirty, we had to scrub the couch ourselves :-(.	-1	Negative
What bothered us the most were the carpets in the corridors, incredibly dirty and smelly.	-1	Negative
The handling of the problem at the reception left me with an unpleasant feeling.	-1	Negative
In the end, of course, I paid it, but the behavior and attitude of the staff left me with a bitter aftertaste from the whole weekend.	-1	Negative
Small selection and unreasonable prices for the services provided.	-1	Negative
In terms of taste - no gourmet experience.	-1	Negative
The rooms could be nicer.	-1	Negative
some journalists are quite annoying, they spend a lot of time with the guests and look at the plate.	-1	Negative
The mentioned pension Atrium, which is located right in the center of Prešov, is terrible.	-1	Negative
Rooms in disrepair, broken bathrooms, sleeping on a sofa bed.	-1	Negative
The worst part was that we almost didn't sleep at all, as there were no classic beds, and before the end of the stay they served us moldy strudel or even onion banana	-1	Negative
I absolutely do not recommend, too much experience, no satisfaction. :(	-1	Negative
On its website, it contains up-to-date information about the services provided, such as - food, room equipment, cleanliness.	-1	Negative
Minus - the inability of the staff to communicate and meet basic requirements	-1	Negative
The diet is limited, it is not possible to choose any of the dishes for dinner, the variety of choices for breakfast is poor, the food is not served.	-1	Negative
The room is too small, it does not have a refrigerator.	-1	Negative
A nice hotel, but zero interest in the customer, during the entire stay, the maid never visited the room, and the trash was not taken out even once.	-1	Negative
The agreed price confirmed by e-mail did not match the actual price realized when paying in the guesthouse, the arrogant behavior of the operator and the owners of the guesthouse, the buffet breakfast was not implemented, there is no price list, the food is disgusting.	-1	Negative
The reluctance of the staff and the food is terrible. The owner complained on the discount portal, but I think that only the low price and not the reviews will get people to this guesthouse. The owner should think about this before complaining.	-1	Negative
Reluctance of the staff and the owner.	-1	Negative
Taspali in 94... very bad food, they said on the discount coupon, entrance to the Anaconda bar, which no longer exists, paper walls through which you could hear every word.. the advantage is close to the water park... but I would definitely go she chose another hotel in the future.	-1	Negative
A strange smell in the corridors, in order to save time and nerves it is better not to try wifi	-1	Negative
cramped rooms, overpriced food prices considering the volume and choice of food, lack of parking spaces, in case of an ongoing event in the lounge on the ground floor, you won't get much sleep on the second floor,	-1	Negative
Two years ago, the food in the hotel restaurants was quite bad, and not all the staff were friendly.	-1	Negative
My friend and I were disappointed with the stay purchased through a coupon.	-1	Negative
First we found out that we had been allocated a twin room which they were not willing to change, although it was obvious that the hotel was not fully booked. The food was average	-1	Negative
The lady unnecessarily spoils the level of the hotel.	-1	Negative
The first disillusionment came when she behaved disgustingly towards me - that I had booked a procedure that she did not know about, the second was when, after an argument with the receptionist on the phone, she pointed out to me that how was she supposed to know that they were offering my procedure as part of the stay package (she had I ordered it by mail for weeks) and the third was an unpleasa…	-1	Negative
It's a shame that because of this lady I will remember the Grand Hotel Bellevue as one of the worst holidays in Slovakia.	-1	Negative
The hotel is poorly marked and the road to it is very problematic. Access to Prague is difficult	-1	Negative
The room disappointed us, it was smaller, which would not matter, but the skylight could not be opened, the condensation from it flows straight onto the bed.	-1	Negative
The attic room is tiny, completely unventilated, which significantly affected the comfort of the room.	-1	Negative
in the small pool, neither the mushroom nor the nozzle from the wall worked, and the castle for children, which is also presented on the website, is completely out of order, rusted, according to the lifeguard, it will be dismantled. It was a big disappointment for the son who was staying with us.	-1	Negative
With the half-board that we had available, I have to rate the breakfast as poor, with a choice of a cold plate or eggs in some way, small portion, almost no garnish.	-1	Negative
Saunas not all functional places fitted... little space and cramped spaces for relaxation	-1	Negative
respect for towels, dirty changing rooms and showers, a strong unpleasant stench from uncleaned toilets, dirty jacuzzis, the noise of Bratislava hip-hop and techno music from the fitness room, sitting together by the pool, unpleasant staff who ask politely for something.	-1	Negative
The staff is rude and boisterous. Right at the entrance, you will be greeted by several links on A4 paper about everything you "must" and "must not".	-1	Negative
Wellness is one huge tragedy, greasy water in the pool, especially since you have to wear a swimming cap	-1	Negative
The bathroom was just as small, but with a shower that looked dark and reminded me of my dorm days. Another shock came when entering the wellness area.	-1	Negative
Unbelievably hot in the room without air conditioning. I will never go back there. It is a pity. they could have a cozy guesthouse out of it.	-1	Negative
This detail could be improved, it unnecessarily spoils a good impression.	-1	Negative
What did not please me, I requested in advance a room with a problem-free wifi connection, which should be available in the entire building, but unfortunately, the signal was very problematic, sometimes none.	-1	Negative
Space and equipment OK.	0	Neutral
We were individually on vacation at the Panda guesthouse in Turčianske Teplice.	0	Neutral
We went for a weekend stay through a discount portal. The coupon was for 2 people, but we also wanted to go with 2 children.	0	Neutral
we only ate breakfast	0	Neutral
guesthouse in a quiet location of Panenská Street	0	Neutral
Since we were out of season, there were very few of us at the hotel.	0	Neutral
Helpful, nice staff.	1	Positive
Hotel in a beautiful environment, in the middle of nature, directly under the ski lift.	1	Positive
The hotel is overall luxurious and provides comfort and a pleasant experience in a beautiful environment.	1	Positive
The rooms are nice and clean, pleasantly furnished.	1	Positive
The bathroom was fantastic.	1	Positive
The luxury hotel exuded history, elegance, marble, crystal, wood and a breathtaking view of the Tatras scenery.	1	Positive
Services at a high level.	1	Positive
The stay at the Kempinski Grand Hotel was not one of the cheapest, but it charmed us with its impressive appearance and enriched us with unforgettable experiences for a lifetime.	1	Positive
The staff is unobtrusive, but attentively helpful.	1	Positive
The hotel fulfilled our desires and expectations in everything, just the building itself with its history is unreal.	1	Positive
The hotel is anything but boring... It will fulfill what it sees in your eyes.	1	Positive
The staff is very nice and always willing to help.	1	Positive
They always have a smile on their face, which makes you feel very good there. :) The rooms are big and always tidy, we have to praise the maids.	1	Positive
like the location of the hotel the most. It is in the beautiful surroundings of Slovakia and it is beautiful to see Štrbské pleso - the pride of the High Tatras, as far as the lake is concerned. :)	1	Positive
A very cozy and picturesque hotel with the right staff and service in the restaurant.	1	Positive
Pleasant accommodation, reception staff very willing and flexible. Excellent breakfast and dinner, excellent cook.	1	Positive
Convenient location of the hotel, near the train station. We will definitely go back there.	1	Positive
Very pleasant staff, the food was of high quality	1	Positive
We had no problem with anything, the parking lot without any problems, an acquaintance came to visit us and there was no problem with that at all.	1	Positive
The guesthouse is cozy, the rooms are very nice and clean, the garbage is emptied every morning. Friendly and kind staff.	1	Positive
Otherwise, the hotel is very nice, the advantage is the proximity to the cable cars or the station.	1	Positive
We were very satisfied. Dear cook Jarka, a really great person and also the owners. The food is very tasty. The rooms are beautiful.	1	Positive
the positive is the price for accommodation and the location near the center.	1	Positive
We found the hotel through a travel agency and were surprised by the more favorable price than in the hotel itself.	1	Positive
Likewise, the entire hotel has a busy, but very well-kept and well-maintained impression.	1	Positive
Wellness made up for the rainy autumn weather and canceled hiking, the children liked the children's corner. Food and service were first class.	1	Positive
The offered hotel services are at a high level, the room is large, suitable for families with children, the food is varied, the wellness services were at a very good level. Very pleasant and helpful staff.	1	Positive
This time, everything at first. Although it was a work stay, we also had a rest.	1	Positive
Of course, the price of the hotel corresponds to the quality, so you have to pay extra for the services, but otherwise I praise it.	1	Positive
The High Tatras and hiking or skiing will never disappoint. Near the water park.	1	Positive
liked the environment the most. Great place for training and similar meetings. The food was also excellent.	1	Positive
And as for the wellness, it was a complete bomb for us. After the training, we really enjoyed it. I also praise the professionalism of the hotel staff.	1	Positive
The pleasant lady at the reception already recommended the family apartment to us when booking. We don't regret paying this extra for him because my husband and I had privacy and the kids were just arguing about the top bed.	1	Positive
The husband also praised the fitness center and its facilities.	1	Positive
The coupon was only with breakfast, but it was worth it because we could choose from the menu and we had "heaven in our mouth".	1	Positive
The family apartment fully met our needs. From visiting the room of other guests who stayed in a double room with a double bed, I can only point out that the room is smaller, but it is quite enough for a couple for a romantic stay.	1	Positive
We stayed there for 3 days, but I can't move, the staff is nice, the pool is amazing, the jacuzzis too, overall a very good atmosphere, so family, perfect for children.	1	Positive
The staff told us that there is a new owner and the new place is brilliant. We have to fully agree with that, because the food, the service, the willingness of the operator and the owner of the restaurant was at a very high level.	1	Positive
I would give a positive point at least to the nice and helpful waitresses.	1	Positive
