# Supplementary material for: Slovak morphological tokenizer using the Byte-Pair Encoding algorithm
Source: PeerJ journal article supplement (doi:10.7717/peerj-cs.2465), 2024-11-19
Supplement: SuppFiles.zip [file kinit_golden_books.xlsx]

## Sheet:  Sheet1
text	labels	label_texts
Predovšetkým - nudný úvod. Práve ten môže mladého čitateľa odradiť, pretože novinár sa na cestu vydá preto, aby ohromil ženu svojich snov	-1	Negative
Ten mu síce neskôr šiel na nervy tak veľmi, že sa ho rozhodil zabiť, ale kvôli obrovskej vlne nepokoja a nespokojnosti ho do literárneho sveta prinavrátil.	-1	Negative
Skutočný príbeh o krutostiach vtedajšieho režimu zanechá stopy na každom	-1	Negative
Priznám sa, trochu mi už liezli na nervy všetky tie superlatívy okolo Elona a úspechu jeho spoločností.	-1	Negative
Len škoda, že na to dopláca jeho rodina.	-1	Negative
Vytkla by som jedine fakt, že v knihe bolo asi 20 odkazov, kvôli ktorým som často musela listovať na koniec knihy	-1	Negative
Vadili mi ale pravopisné chyby, to nepochopím, ako mohlo prejsť jazykovou úpravou.	-1	Negative
vznikol tak prakticky nečitateľný hybrid, navyše s faktickými chybami	-1	Negative
Reklama na Muska za 18€, ktorá mne osobne nič nedala	-1	Negative
Slovenský preklad je hrozný, po pár stránkach som musel prestať čítať a radšej som si kúpil kindle verziu originálu	-1	Negative
Odfláknutá práca vydavateľstva je katastrofálna.	-1	Negative
Okrem hlúpych pravopisných chýb, kniha nešetrí ani zle vyskloňovanými slovami a zlými prekladmi z angličtiny.	-1	Negative
chvíľkami ma to nebavilo čítať a radšej som si fakt išla zabehať	-1	Negative
Avšak za mne je toto najslabšie dielo a koniec bol pre mňa obrovským sklamaním.	-1	Negative
Potom už dej stagnoval a čítanie o filozofovaní o paralelných svetoch a vesmíroch ma fakt nebavilo.	-1	Negative
postavy vo mne vyvolávali nervy, takže som si musela robiť dúškový čajík na upokojenie.	-1	Negative
Myslela som, že to bude celé len zlý sen pre dobro zúčastnených. Ich smola.	-1	Negative
Stred už slabší a záver úplná katastrofa	-1	Negative
V tejto knihe, bohužiaľ, Karika trafil presne ten motív, ktorý sa mi veľmi nepáči	-1	Negative
Škoda tých zostávajúcich strán, nudila som sa ... síce som stále čakala "na niečo", ale to niečo sa nedostavil	-1	Negative
Podľa recenzií som sa na knihu tešil, ale zostal som sklamaný.	-1	Negative
Za mňa úplne nevyužitý potenciál, veľmi mi tam chýbal cit pre gradáciu	-1	Negative
Kniha Smršť je jedným veľkým sklamaním .... jednoduchý dej bez zápletky	-1	Negative
Takú hlúposť som zatiaľ ešte nečítal.	-1	Negative
Toto bolo čisté sklamanie.	-1	Negative
Bohužiaľ toho bolo málo. Oveľa viac tam bolo filozofovanie, v ktorom som sa každú chvíľu strácal, nech som sa akokoľvek sústredil.	-1	Negative
Mne osobne to absolútne nedávalo zmysel a úplne to pokazilo celý dojem z knihy	-1	Negative
A veľmi nudné. Škoda no, nevyužitý potenciál :-(	-1	Negative
Je mi ľúto, že po knihe TMA prišlo ďalšie sklamanie v podobe tohto nezáživného, povedal by som až umelo a zbytočne naťahovaného príbehu vedecko-fantasticko-konšpiračnými teóriami.	-1	Negative
Záver ako taký bol oproti zvyšku knihy o niečo náročnejší a pre mňa nezáživný. Knihu som si objednala na základe recenzií a čakala som od toho niečo viac.	-1	Negative
Kniha ma sklamala. Vyzeralo to na paradný zážitok, miestami som síce ani nedýchal, ale čakal som od autora viac.	-1	Negative
Karika ma opäť nepresvedčil. Každou knihou mu dám šancu, pretože námet knihy ma zaujme... ale táto kniha je od začiatku až do konca nezáživná.	-1	Negative
Ale pri tejto som bola sklamaná, lebo emócie aké vo mne vyvolal pri ostatných sa nenaplnili.	-1	Negative
Považujem ju za najslabšiu z jeho kníh, ktorú som mala možnosť čítať.	-1	Negative
Mám prečítané všetky knihy od neho a táto bola pre mňa slabota. Námet dobrý, ale príliš veľa obkecov o ničom a hlavne koniec som už preletela len tak tak.	-1	Negative
Sklamanie bol koniec, poslednej strany som mala chuť preskočiť - zdĺhavé hypotetizovanie o (ne)vedomí, sklamaní postavy zo života a nahle "uvedomenie" si vo mne vzbudilo nedôveru az pocit halucinácií ktoré jednoducho prišli so smrťou.	-1	Negative
Škoda, očakávania bola veľká, aj nasadená latka vysoko.	-1	Negative
Oproti trhline a strachu je to veľmi slabé.	-1	Negative
Posledná tretina knihy bola pre mňa sklamaním.	-1	Negative
Do polovice knihy ma to ešte ako tak bavilo ale potom sa to zmenilo na blbosť podobne ako priepasť.	-1	Negative
trošku škoda je však to, že Smršť nie je až tak veľmi prepracovaná kniha	-1	Negative
Jediné mínus záver pretože ho spisovateľ ukončil a zároveň nechal otvorený.	-1	Negative
Okrem profesora a novinára sa na cestu vydávajú ešte dvaja dobrodruhovia, iný profesor, popierajúci Challengerove tvrdenia a najskúsenejší člen ich výpravy, lovec a cestovateľ.	0	Neutral
Ich kroky smerovali najskôr do Londýna a nakoniec do malého írskeho mestečka. Novej životnej situácii sa snažili prispôsobiť	0	Neutral
Knihu hodnotím ako priemer.	0	Neutral
Dovolil by som si ešte jednu technickú poznámku – dej sa odohráva v októbri 2017 a je v ňom niekoľkokrát spomenutá vražda novinára Kuciaka. Táto udalosť sa však odohrala až vo februári 2018.	0	Neutral
Neviem, ako dlho vznikala táto kniha, ale teoreticky hlavná os by mohla vzniknúť aj za jeden večer.	0	Neutral
Priznám sa, že toto je moja prvá kniha od Kariky. A chcela som si ju prečítať ako prvú a potom sa pustím aj do ostatných.	0	Neutral
Čo som si všimol, sú dialógy. Prečítané mám od autora všetko, ale tak živé dialógy si nepamätám	0	Neutral
Keď má kniha viac ako sto rokov, ale je pútavá a zaujímavá aj dnes, je to taký malý zázrak.	1	Positive
Román má všetko, o čom mladší aj starší hrdina sníva.	1	Positive
Profesor Challenger, ako hlavná postava knihy aj celej dobrodružnej výpravy, je parádny chlap.	1	Positive
Neobyčajný príbeh výnimočných žien, ktoré s novou silou a vervou začínajú žiť nový život v cudzom meste.	1	Positive
Čitateľ sa môže tešiť na históriu Muskovcov, ktorá bola už za čias Elonova deduška veľmi bohatá.	1	Positive
Musím uznať, že autor spracoval Muskov príbeh brilantne, nikdy ma nenudila a dozvedel som sa mnoho zaujímavých informácií aj zo zákulisia jeho života či firemných spoločností.	1	Positive
Príbeh Elona na mňa pôsobil veľmi inšpirujúco.	1	Positive
Vrelo odporúčam ľuďom, ktorí sa zaujímajú o techniku alebo sa chcú dozvedieť viac o Elonových projektoch, prípadne jeho zmýšľaní.	1	Positive
Geniálna kniha o geniálnom vizionári alebo človek, ktorý premieňa svoje sny na skutočnosť.	1	Positive
Nikto kto si túto knihu kúpi neoľutuje.	1	Positive
Aj keď som žena, kniha sa mi veľmi páčila :-)	1	Positive
Aj napriek množstvu preklepov a chýb v preklade knihu odporúčam	1	Positive
Kniha je super, kto sa zaujíma o Muska alebo nové technológie tak určite odporúčam.	1	Positive
Páči sa mi, že je v nej poukázané na to, ako tvrdo musel pán Musk makať, aby dosiahol veci, v ktorých mu nikto zo začiatku ani neveril, že sú možné – hoci mal vlastne v kritických chvíľach giga luck faktor.	1	Positive
Veľmi zaujímavá kniha s množstvom osobných príbehov a receptov. Kniha ma veľmi zaujala	1	Positive
Neľutujem však, pretože kniha je okrem behania aj o stravovaní a celkovom postoji k behaniu.	1	Positive
Veľmi zaujímavý životný športový receptár. Od biografia cez šport a motiváciu k jedlám a receptom. V tejto knihe nájdete zhrnuté takmer všetko a veľmi dobre sa číta.	1	Positive
Táto kniha patrí k top knihám na našom trhu čo sa týka bežeckej tematiky.	1	Positive
Páči sa mi, že nám autor opäť približuje krásy a zákutia nášho Slovenska.	1	Positive
Autora zbožňujem a táto kniha nemala chybu.	1	Positive
Karika ma opäť nesklamal a teším sa na jeho ďalšie podobné knihy.	1	Positive
Ďalší vydarený kúsok Kariku. Oplatí sa ho čítať.	1	Positive
Vrelo odporúčam každému fanúšikovi tohto žánru. Josef Karika je výborný autor thilerov/hororov.	1	Positive
Kniha ma zaujala od prvého čítania až po koniec, myslím, že to bola jedna z tých lepších kníh, ktoré autor napísal.. dobre sa čítala	1	Positive
Zaujímavý príbeh, napínavý, dynamický, zasadený do regiónu Liptova a Západných Tatier, ku koncu trochu filozofie a metafyziky.	1	Positive
Karika opäť nesklamal, ide si svoje, svojim štýlom a rytmom, so svojimi postavami a myšlienkami, názormi. Odporúčam	1	Positive
Ako vždy ďalšia skvelá kniha od tohto autora, perfektne čítanie do týchto pochmúrnych dní.	1	Positive
Tešila som sa na poriadnu zápletku, námet vetra Halny a ženy v čiernom na poľsko-slovenskom pohraničí, ktoré sme neraz navštívili, ma nadchol.	1	Positive
Pán Karika zase raz nesklamal a už sa teším na ďalšiu knižku.	1	Positive
Ďalšia kniha, ktorá nemá chybu, je to úžasné napätie, jednoducho husia koža zvládne dejové prekvapenia... Je to jednoducho úžasné.	1	Positive
Zaujímavý dej, príbeh vložený do prostredia stále plný napätia, tak ako som už pri Kariku zvyknutá. Nikdy nesklame.	1	Positive
Pán Karika opäť nasklamal! Bola to výborná kniha!	1	Positive
Kniha splnila moje očakávania, príbeh ťa vtiahne do deja...	1	Positive
Kniha mala rozhodne zaujímavý námet, páčilo sa mi to prepojenie halného vetra a babky	1	Positive
V zásade nemôžem toho veľmi vytknúť	1	Positive
Smršť dávam sto percent. Najviac sa mi páčila scéna na benzínovej pumpe.	1	Positive
Páčilo sa mi, že svojmu typickému luzrovi tentoraz doprial aj trochu lásky.	1	Positive
Každopádne po prečítaní môžem knihu hodnotiť ako super, aj keď autor píše dosť predvídavo a dá sa očakávať, ako kniha skončí bola super plná nečakaných zvratov a neľutujem, že som si ju kúpil.	1	Positive
Záver formou úvahy mi vôbec neprekážal.	1	Positive
Milujem všetky knihy od tohto autora a teším sa na ďalšie.	1	Positive
Pri kúpe som mala trochu obavy, či kniha bude taká dobrá ako ju ospevovali a musím povedať, že som sa nesklamala.	1	Positive
V rámci žánru knihu považujem za veľmi vydarený počin. Dej je svižný, atmosféra je temná, dostane sa pod kožu.	1	Positive
