# Supplementary material for: Slovak morphological tokenizer using the Byte-Pair Encoding algorithm
Source: PeerJ journal article supplement (doi:10.7717/peerj-cs.2465), 2024-11-19
Supplement: SuppFiles.zip [file kinit_golden_books.xlsx]

## Sheet:  Sheet1
text	labels	label_texts
Above all - boring introduction. It is he who can discourage the young reader, because the journalist goes on a journey to impress the woman of his dreams	-1	Negative
Although he later got on his nerves so much that he decided to kill him, but due to a huge wave of restlessness and dissatisfaction, he returned him to the literary world.	-1	Negative
The true story of the atrocities of the regime at that time will leave a mark on everyone	-1	Negative
I'll admit, all the superlatives surrounding Elon and the success of his companies were getting on my nerves a little.	-1	Negative
It's just a shame that his family is paying for it.	-1	Negative
I would only criticize the fact that there were about 20 references in the book, because of which I often had to scroll to the end of the book	-1	Negative
But the spelling mistakes bothered me, I don't understand how it could have gone through the language editing.	-1	Negative
thus a practically unreadable hybrid was created, moreover with factual errors	-1	Negative
An advertisement for Musk for €18, which personally gave me nothing	-1	Negative
The Slovak translation is terrible, after a few pages I had to stop reading and rather bought the kindle version of the original	-1	Negative
The sloppy work of the publisher is disastrous.	-1	Negative
In addition to silly spelling mistakes, the book does not skimp on badly inflected words and bad translations from English.	-1	Negative
sometimes I didn't enjoy reading it and I really preferred to go for a run	-1	Negative
However, for me this is the weakest work and the ending was a huge disappointment for me.	-1	Negative
After that, the story stagnated and I really didn't enjoy reading about philosophizing about parallel worlds and universes.	-1	Negative
the characters made me nervous, so I had to make a sip of tea to calm myself down.	-1	Negative
I thought it would all be a bad dream for the sake of those involved. Their bad luck.	-1	Negative
The middle is already weaker and the end is a complete disaster	-1	Negative
In this book, unfortunately, Karika hit exactly the motif that I don't like very much	-1	Negative
It's a shame about the remaining pages, I was bored ... although I was still waiting for "something", but that something didn't show up	-1	Negative
Based on the reviews, I was looking forward to the book, but I was disappointed.	-1	Negative
For me, completely unused potential, I really lacked a feeling for gradation there	-1	Negative
The Smršť book is one big disappointment .... a simple plot without a plot	-1	Negative
I have never read such stupidity before.	-1	Negative
This was pure disappointment.	-1	Negative
Unfortunately, it was not enough. There was much more philosophizing in which I lost myself every moment, no matter how focused I was.	-1	Negative
It made absolutely no sense to me personally and it completely spoiled the whole impression of the book	-1	Negative
And very boring. Too bad, unused potential :-(	-1	Negative
I'm sorry that after the book TMA came another disappointment in the form of this lifeless, I would say artificially and unnecessarily stretched story with science-fantasy-conspiracy theories.	-1	Negative
As such, the ending was somewhat more difficult than the rest of the book and dull for me. I ordered the book based on the reviews and expected something more from it.	-1	Negative
The book disappointed me. It looked like a great experience, sometimes I couldn't even breathe, but I expected more from the author.	-1	Negative
Karika did not convince me again. I give it a chance with every book because the plot of the book intrigues me... but this book is dull from start to finish.	-1	Negative
But I was disappointed with this one, because the emotions he evoked in me with the others did not come true.	-1	Negative
I consider it the weakest of his books that I have had the opportunity to read.	-1	Negative
I have read all his books and this one was a weakness for me. The subject is good, but too many ramblings about nothing, and especially the end, I just skimmed through it.	-1	Negative
The disappointment was over, I wanted to skip the last pages - the lengthy hypothesizing about (un)consciousness, the character's disappointment in life and the sudden "realization" instilled in me mistrust and the feeling of hallucinations that simply came with death.	-1	Negative
It's a shame, the expectations were high, and the set bar was set high.	-1	Negative
It's very weak against rift and fear.	-1	Negative
The last third of the book was disappointing for me.	-1	Negative
I still enjoyed it until the middle of the book, but then it turned into nonsense, like an abyss.	-1	Negative
it's a bit of a shame, however, that Smršť is not a very elaborate book	-1	Negative
The only minus is the conclusion because the writer ended it and left it open at the same time.	-1	Negative
In addition to the professor and the journalist, two more adventurers set out on the journey, another professor, who denies Challenger's claims, and the most experienced member of their expedition, a hunter and a traveler.	0	Neutral
Their steps led first to London and finally to a small Irish town. They tried to adapt to the new life situation	0	Neutral
I rate the book as average.	0	Neutral
I would like to make one more technical note - the story takes place in October 2017 and the murder of journalist Kuciak is mentioned several times in it. However, this event did not take place until February 2018.	0	Neutral
I don't know how long this book took, but theoretically the main axis could be created in one evening.	0	Neutral
I confess that this is my first book by Karika. And I wanted to read it first, and then I'll start with the others.	0	Neutral
What I noticed is the dialogues. I have read everything from the author, but I don't remember the dialogues so vividly	0	Neutral
When a book is more than a hundred years old, but still engaging and interesting today, it's such a small miracle.	1	Positive
The novel has everything that a younger and older hero dreams of.	1	Positive
Professor Challenger, as the main character of the book and the entire adventure, is a great guy.	1	Positive
An extraordinary story of extraordinary women who, with new strength and vigor, begin to live a new life in a foreign city.	1	Positive
The reader can look forward to the history of the Musk family, which was already very rich during the time of Elon's grandfather.	1	Positive
I have to admit that the author handled Musk's story brilliantly, he never bored me and I learned a lot of interesting information from behind the scenes of his life and companies.	1	Positive
The story of Elon was very inspiring to me.	1	Positive
I highly recommend it to people who are interested in technology or want to learn more about Elon's projects or his thinking.	1	Positive
A brilliant book about a brilliant visionary or a man who turns his dreams into reality.	1	Positive
No one who buys this book will regret it.	1	Positive
Even though I'm a woman, I really liked the book :-)	1	Positive
Despite the number of typos and mistakes in the translation, I recommend the book	1	Positive
The book is great, I definitely recommend it to anyone interested in Musk or new technologies.	1	Positive
I like that it points out how hard Mr. Musk had to work to achieve things that no one even believed were possible in the beginning - although he actually had a giga luck factor at critical moments.	1	Positive
very interesting book with lots of personal stories and recipes. I was very interested in the book	1	Positive
However, I do not regret it, because the book is not only about running, but also about nutrition and the general attitude towards running.	1	Positive
A very interesting lifestyle sports recipe. From biography to sports and motivation to food and recipes. You will find almost everything summarized in this book and it is a very good read.	1	Positive
This book belongs to the top books on our market in terms of running topics.	1	Positive
I like that the author brings the beauty and corners of our Slovakia closer to us again.	1	Positive
adore the author and this book was flawless.	1	Positive
Karika did not disappoint me again and I look forward to his other similar books.	1	Positive
Another successful piece by Karik. It is worth reading.	1	Positive
I highly recommend it to any fan of this genre. Josef Karika is an excellent thriller/horror author.	1	Positive
The book captivated me from the first reading to the end, I think it was one of the better books written by the author.. it was a good read	1	Positive
An interesting story, exciting, dynamic, set in the region of Liptov and the Western Tatras, with a bit of philosophy and metaphysics towards the end.	1	Positive
Karika did not disappoint again, he goes his own way, with his style and rhythm, with his characters and thoughts, opinions. I recommend	1	Positive
As always another great book from this author, a perfect read for these gloomy days.	1	Positive
I was looking forward to a proper plot, the theme of Halna's wind and the woman in black on the Polish-Slovak border, which we visited many times, excited me.	1	Positive
Mr. Karika did not disappoint once again and I am already looking forward to the next book.	1	Positive
Another book that doesn't go wrong, it's amazing suspense, just goosebumps can handle the plot surprises... It's just amazing.	1	Positive
An interesting plot, a story embedded in an environment still full of tension, as I am already used to with Karika. It never disappoints.	1	Positive
Mr. Karika disappointed again! It was an excellent book!	1	Positive
The book met my expectations, the story draws you into the action...	1	Positive
The book definitely had an interesting subject, I liked the connection between the wind and the grandmother	1	Positive
Basically, I can't fault it much	1	Positive
I give Smerk one hundred percent. I liked the gas station scene the most.	1	Positive
I liked that he gave his typical loser some love this time.	1	Positive
Anyway, after reading it, I can rate the book as super, even if the author writes quite presciently and it can be expected how the book ends, it was super full of unexpected twists and I don't regret buying it.	1	Positive
The conclusion in the form of reasoning did not bother me at all.	1	Positive
I love all the books by this author and look forward to more.	1	Positive
When I bought it, I was a little worried whether the book would be as good as it was praised for, and I must say that I was not disappointed.	1	Positive
Within the genre, I consider the book to be a very successful achievement. The plot is fast-paced, the atmosphere is dark, it gets under your skin.	1	Positive
