# Supplementary material for: Slovak morphological tokenizer using the Byte-Pair Encoding algorithm
Source: PeerJ journal article supplement (doi:10.7717/peerj-cs.2465), 2024-11-19
Supplement: SuppFiles.zip [file kinit_golden_cars.xlsx]

## Sheet:  Sheet1
text	labels	label_texts
Aplikácia Bluelink nás príliš neoslovila	-1	Negative
Menší problém môže byť akurát načasovanie onoho správneho momentu.	-1	Negative
Otravoval nás akurát spôsob jeho aktivácie. Pri prepínaní režimov musíte prelistovať postupne všetky tri režimy.	-1	Negative
Zmenou pohonu však utrpela maximálnu nosnosť, čo má na svedomí hmotnosť batérií.	-1	Negative
Tu však prichádza aj naša prvá výhrada a tou je, že eSprinter skutočne nevydáva žiadny zvuk, a to ani pri cúvaní.	-1	Negative
Testovacie vozidlo navyše nebolo vybavené senzormi ani príplatkovou cúvacou kamerou, čo pre skriňovú dodávku s obmedzeným výhľadom nie je práve ideálna kombinácia.	-1	Negative
Oveľa viac sa na dojazde negatívne prejavuje vyššia rýchlosť. Aj z tohto dôvodu je v základnej verzii eSprinter obmedzený maximálne na 80 km/h	-1	Negative
Kameňom úrazu je totiž podľa očakávania cena, ktorá v základe začína na 64 986 eur s DPH.	-1	Negative
Veľkolepé uvedenie nových elektromobilov viacerým výrobcom prekazila pandémie.	-1	Negative
Za tie peniaze to určite nestojí.	-1	Negative
Tento paskvil (z dizajnovej stránky, nie úžitkovo) je niečo hrozné. Škoda toho auta.	-1	Negative
Že automobilka to arogantne zamlčuje je jedna vec	-1	Negative
Prejav CVT prevodovky nemusí každému vyhovovať.	-1	Negative
Na rozdiel od Swiftu chýba sledovanie mŕtvych uhlov či adaptívny tempomat.	-1	Negative
Kombinácia atmosférického štvorvalca a CVT prevodovky s plynule meniteľným prevodovým pomerom nemusí každému vyhovovať.	-1	Negative
Najväčšou slabinou tohto drobného Suzuki je pomalšie riadenie, ktoré pocítite pri potrebe rýchlych manévrov s volantom.	-1	Negative
Ak ste na kombi Arteon čakali, pretože potrebujete väčší kufor, pravdepodobne pre vás bude sklamaním, pri vzpriamených sedadlách totiž pribudli iba dva litre.	-1	Negative
K motoru sme pristupovali s miernou nedôverou, pretože sme skúšali slabší 150-koňový diesel s predným pohonom.	-1	Negative
V minulosti nás občas v kombinácii aj so silnejšími motormi TDI sklamala.	-1	Negative
Nedá sa však ubrániť pocitu, že pár koní navyše by z Arteonu urobilo oveľa zábavnejšie auto.	-1	Negative
Časť nadšenia však opadne pri pohľade do cenníka, kedy začnete zaváhať.	-1	Negative
Na prvý pohľad žiadna tragédia, ale zaskočilo nás čo všetko vám Volkswagen dá až za príplatok. Aj v najvyššej výbave totiž musíte priplácať za cúvaciu kameru alebo bočné airbagy a pre zadné sedadlá.	-1	Negative
Veľmi slabá hodnota tejto recenzie	-1	Negative
toto auto vyzerá úplne fádne	-1	Negative
vnútorný design mi vôbec nesedí. cudzí ako feetový sluhabák ok, ale dobrovoľne by som si ho nekúpil	-1	Negative
Kúpa karavanu nie je najlacnejšia, nehovoriac o tom, že ako jediné auto v rodine by to nebola najšťastnejšia voľba.	-1	Negative
Tu však musíme vytknúť zlú spoluprácu s aplikáciou Waze cez Apple Carplay.	-1	Negative
Rokmi overené riešenie však pôsobí trochu zastaralo aj v takej dodávke.	-1	Negative
Trochu problematické je to však s elektrinou, Tourneo totiž po 30 minútach od vypnutia zapaľovania odpojí aj tú.	-1	Negative
Tým pádom nebude fungovať ani chladnička, ale ani vodné čerpadlo, a tak sa nevyhnete občasnému zapínaniu zapaľovania, aby všetko fungovalo.	-1	Negative
Chýbajúca externá zásuvka je jednoducho daňou za cenovo oveľa dostupnejšie kempingové auto.	-1	Negative
Nie je sa čo diviť, prakticky sa nezmenil od uvedenia modelu pred ôsmimi rokmi.	-1	Negative
Priznáme sa, že sme k nemu pristupovali trochu s obavami.	-1	Negative
Nepríjemný hukot motora vo vysokých otáčkach typický pre CVT prevodovky nezmizol.	-1	Negative
Najväčším problémom je, keď sa k vyššej rýchlosti pridá aj mokrá vozovka. V daždi totiž Space Star najvýraznejšie prezrádza svoje slabiny.	-1	Negative
Má však niekoľko pomerne výrazných chýb, cez ktoré sa len ťažko preniesť.	-1	Negative
zrýchlenie je všeobecne v tomto aute dosť slabé vzhľadom na slabý motor	-1	Negative
Elektrický pohon nijako nezasahuje do nákladového priestoru, ktorý tak ponúka rovnakých 11 metrov kubických ako štandardná verzia.	0	Neutral
Prvé dojmy po sadnutí za volant sa ničím nelíšia od akejkoľvek inej dodávky.	0	Neutral
Pred vodičom sa nachádzajú klasické analógové prístroje, iba otáčkomer nahradil ukazovateľ spotreby energie.	0	Neutral
ID.4 totiž využíva podvozkovú platformu MEB vyvinutú špeciálne pre elektromobily.	0	Neutral
K tomu bol testovaný Arteon vybavený automatickou sedemstupňovou prevodovkou DSG.	0	Neutral
Je okamžite jasné, že v tejto verzii nepôjde o pracovnú dodávku určenú na vozenie stavebného materiálu či cesty na zberný dvor.	0	Neutral
Bežné Tourneo Custom v tejto verzii odvezie osem pasažierov, ale tretí rad sedadiel v našom prípade nahradil kempová výbava.	0	Neutral
Mnohí asi ani presne nevedia, aké auto si majú predstaviť pod menom Space Star. Japonská automobilka Mitsubishi súčasný model predstavila v roku 2012 a ďalších šesť ešte trvalo, kým potichu zavítal aj na slovenský trh.	0	Neutral
Pozitívne hodnotíme príchod kombi N Line verzie, ktorá vyzerá lepšie.	1	Positive
Predbiehanie v režime Normal nie je žiadny veľký problém. Stačí dať „tehlu na pedál“ v správny moment a všetko sa podarí.	1	Positive
Veľmi dobrá a predvídateľná je aj reakcia motora na stláčanie plynového pedála. Zrýchľovanie sa ľahšie reguluje a na predbiehací manéver sa ľahšie pripravíte. Hyundai i30 nám ukázal, akú dôležitú úlohu zohráva nastavenie softvéru.	1	Positive
Z nových prvkov nás zaujala práve výbava N Line a to designom aj výbornými sedadlami, ktoré sme spomínali vo videu.	1	Positive
Asynchrónny elektromotor s maximálnym výkonom 85 kW (116 koní) as krútiacim momentom 295 Nm rozhýbe dodávku bez najmenších problémov	1	Positive
Príjemným prekvapením bolo, že dojazd sa príliš výrazne nezmenil ani po naložení niekoľkých skríň a iných kusov nábytku.	1	Positive
Ide však o skutočne zaujímavé riešenie na takzvanú „poslednú míľu“ doručovania zásielok.	1	Positive
Oproti predĺženému Tiguanu sú kapota, ale aj previsy vpredu a vzadu kratšie, takže sa s autom v podzemných garážach aj v úzkych uličkách lepšie manévruje.	1	Positive
Platforma MEB okrem toho, že v budúcnosti pomôže znížiť cenu elektromobilov (využije ju napríklad aj Ford), sa vyznačuje pomerne hrubou, ale rovnou podlahou	1	Positive
Práve kvôli hrúbke podlahy je ideálne ju zamontovať do SUV, kde je vyšší posed vítaný.	1	Positive
Lenže kilá navyše kvôli väčšej batérii sa na jazdných vlastnostiach najsilnejšej verzie ID.4 prejavujú z pohľadu vodiča pozitívne. Auto pekne drží v zákrutách a dobre zvláda nerovnosti.	1	Positive
U ID.4 sa to podarilo na jedničku a to aj pri diaľničnom tempe. Jednoducho spolu s naladením podvozku máte pocit, že sa veziete v aute prémiovej značky a to aj bez príplatkových adaptívnych tlmičov.	1	Positive
Pokyny navigácie sa premietajú na čelné sklo, auto vás navyše vizuálne informuje o okolitých účastníkoch prevádzky, čo sme ocenili v hustom daždi na diaľnici. Vtedy Enyaq bez problémov rozoznával auto pred sebou, aj keď sa strácalo v oblaku kvapiek	1	Positive
Napriek tomu nás zaujal svetelný LED pás pod čelným sklom, ktorý farebnými zmenami pomáha vodičovi pri jazde, napríklad pri zapnutej navigácii ukazuje do ktorej strany odbočiť alebo výstražným červeným svetlom upozorní na riziko kolízie.	1	Positive
Prvýkrát sa nám stalo, že Škoda v porovnaní s Volkswagenom pôsobila luxusnejšie a nezaostávala ani jazdnými vlastnosťami.	1	Positive
Aj v nižšej výbave pôsobí zaujímavejšie, jeho minimalistický interiér je vzdušnejší a nebojí sa nekonvenčných riešení vrátane zapustených kľučiek s elektrickým otváraním.	1	Positive
všetko zlé, je aj na niečo dobré	1	Positive
Aj v červenej Velvet s čiernou falošnou mriežkou a striebornými diskami pôsobí Enyaq impozantne, najmä spredu.	1	Positive
Prvé, čo vás privíta po otvorení dverí, je vzdušný interiér s veľmi solídnym spracovaním.	1	Positive
Ten je navyše vsadený hlboko do prístrojovej dosky, takže vodičovi umožňuje lepší výhľad.	1	Positive
Napriek menším rozmerom obrazovky nemožno sťažovať na zlú čitateľnosť či nedostatok informácií.	1	Positive
Po priestorovej stránke Enyaqu nemáme čo vytknúť.	1	Positive
Vie prehltnúť až 585 litrov a nechýbajú praktické detaily, ako výklopné háčiky na nákupné tašky, zásuvka na nabíjanie či tiahla na sklopenie zadných operadiel.	1	Positive
Zároveň však robí všetko príjemne plynulo a preklz predných kolies tu nehrozí.	1	Positive
Pochvalu má utlmenie kabíny, čo je u tichých elektromobilov dosť dôležité.	1	Positive
Dobre zvládnutá je aj akustika veľkej kabíny, mierne dunenie počuť len od kolies pri horšom povrchu cesty.	1	Positive
Ten v mestskej premávke funguje výborne a viete jazdiť so spotrebou 17 kWh, čo je na taký veľký elektromobil naozaj slušné.	1	Positive
Mne sa v tejto triede dlhodobo páči Panda, aktuálna verzia Cross vyzerá stále skvele.	1	Positive
Predošlá generácia Ignisu vyrábaná v rokoch 2003 až 2008 v maďarskom Ostrihome bola na Slovensku veľmi obľúbená a už akosi predpovedala príchod éry mestských SUV.	1	Positive
Okrem trochu drsnejšieho vzhľadu priniesol aj vylepšenú technológiu a pre európskych zákazníkov po prvýkrát bezstupňovú CVT prevodovku.	1	Positive
Vďaka svetlej výške 180 mm je nastupovanie a vystupovanie pohodlné a platí to aj pre zadné sedadlá.	1	Positive
Jednak preto, že rám dverí je dostatočne široký, ale aj miesta na sedadlách je pre dvoch dospelých prekvapivo dostatok.	1	Positive
Prístrojová doska je prehľadná a jednoduchá, všade sú tvrdé plasty, ale nikde nič nevŕzga.	1	Positive
Pochvalu si však zaslúži predné svetlá so šošovkovou technológiou zo Swiftu.	1	Positive
Kto jazdí rozvážne a nie štýlom brzda-plyn, CVT mu v Ignise nebude vadiť, po rozbehnutí pri mestskej rýchlosti 50 km/h motor pracuje až v prekvapivo nízkych otáčkach.	1	Positive
Nastavenie podvozku je prekvapivo solídne, ani pri vyššej stavbe karosérie sa Ignis v zákrutách výrazne nenakláňa as 16-palcovými kolesami dobre zvláda tlmiť nerovnosti.	1	Positive
Možno je to trochu zvláštne, ale často nás vie najviac potešiť podarené cenovo dostupné auto. Ignis takým je a ponúka všetko, čo od mestského auta čakáte.	1	Positive
Hlavným dôvodom pre výber tohto modelu bude najmä silueta, ktorá sa eleganciou môže smelo porovnávať s fastbackom. Väčší zadok Arteonu pristane možno ešte viac.	1	Positive
Najzaujímavejší je neobvyklý pás denného svietenia, ktorý sa tiahne od svetiel cez celú šírku masky, prerušený je iba logom automobilky.	1	Positive
Pokiaľ sa plánujete v Arteone voziť vzadu, nebude vám chýbať priestor pre nohy, oproti fastbacku oceníte viac miesta nad hlavou.	1	Positive
Za príplatok 2 160 eur sa ponúka zimný balík výbavy, ktorý najviac zvýši komfort práve posádke vzadu.	1	Positive
Čerešničkou na torte je masážne sedadlo vodiča.	1	Positive
ale tentoraz odvádza výbornú prácu, radí plynulo a ani slabší motor zbytočne nedusí	1	Positive
Dych motora dochádzal až pri vyšších diaľničných rýchlostiach, najviac nás však prekvapila jeho pružnosť v meste.	1	Positive
Moderný diesel patrí k tomu najlepšiemu, čo má v súčasnosti Volkswagen v ponuke, ale platí to najmä o menších modeloch.	1	Positive
Aj v tomto prípade má však svoje opodstatnenie v podobe priaznivej spotreby, tá sa počas testu vyšplhala v priemere na 6 litrov.	1	Positive
Napriek slabšej motorizácii sme si jazdu najviac užili po diaľnici, kde bol Arteon skutočne nenáročným autom. Jazdný asistent Travel Assist nezaváhal ani v hustej hmle, kedy sme ho ocenili najviac.	1	Positive
Testované auto príjemne prekvapilo aj koženými sedadlami či xenónovými svetlometmi, ktoré pri dodávkach nebývajú štandardom ani dnes.	1	Positive
Po zasadnutí za volant začína vodič tušiť, že toto môže byť celkom fajn auto na výlety.	1	Positive
Motor s výkonom 185 koní a krútiacim momentom 415 Nm nemal najmenší problém rozhýbať aj rozmerné Tourneo, pružnosť mu nechýbala ani pri diaľničných presunoch.	1	Positive
