# Supplementary material for: Slovak morphological tokenizer using the Byte-Pair Encoding algorithm
Source: PeerJ journal article supplement (doi:10.7717/peerj-cs.2465), 2024-11-19
Supplement: SuppFiles.zip [file kinit_golden_cars.xlsx]

## Sheet:  Sheet1
text	labels	label_texts
The Bluelink app didn't really appeal to us	-1	Negative
The timing of the right moment can be a minor problem.	-1	Negative
It was the method of its activation that annoyed us. When switching modes, you must scroll through all three modes in turn.	-1	Negative
However, due to the change in drive, the maximum load capacity has suffered, which is due to the weight of the batteries.	-1	Negative
However, here comes our first gripe and that is that the eSprinter doesn't really make any sound, even when reversing.	-1	Negative
In addition, the test vehicle was not equipped with sensors or an optional reversing camera, which is not exactly an ideal combination for a box van with limited visibility.	-1	Negative
higher speed has a much more negative effect on the range. Also for this reason, the eSprinter is limited to a maximum of 80 km/h in the basic version	-1	Negative
As expected, the stumbling block is the price, which basically starts at 64,986 euros including VAT.	-1	Negative
The spectacular launch of new electric cars by several manufacturers was thwarted by the pandemic.	-1	Negative
It's definitely not worth the money.	-1	Negative
This pascovil (from the design point of view, not in terms of utility) is something terrible. Shame about that car.	-1	Negative
It's one thing that the car company arrogantly keeps it quiet	-1	Negative
The performance of the CVT transmission may not suit everyone.	-1	Negative
Unlike the Swift, there is no blind spot monitoring or adaptive cruise control.	-1	Negative
The combination of an atmospheric four-cylinder engine and a CVT transmission with a continuously variable gear ratio may not suit everyone.	-1	Negative
The biggest weakness of this tiny Suzuki is the slower steering, which you will feel when you need to make quick maneuvers with the steering wheel.	-1	Negative
If you've been waiting for the Arteon station wagon because you need a bigger trunk, you'll probably be disappointed, as only two liters have been added with the seats upright.	-1	Negative
We approached the engine with a bit of skepticism, having tried the weaker 150bhp front-wheel-drive diesel.	-1	Negative
In the past, it sometimes disappointed us in combination with more powerful TDI engines.	-1	Negative
But one can't help but feel that a few extra horses would make the Arteon a much more fun car.	-1	Negative
However, part of the enthusiasm fades when you look at the price list, when you start to hesitate.	-1	Negative
At first glance, no tragedy, but we were surprised by what Volkswagen can give you for an additional fee. Even in the highest equipment, you have to pay extra for a reversing camera or side airbags and for rear seats.	-1	Negative
Very poor value for this review	-1	Negative
this car looks absolutely bland	-1	Negative
the interior design does not suit me at all. stranger than fet's servant ok, but I wouldn't willingly buy it	-1	Negative
Buying a caravan is not the cheapest, not to mention that as the only car in the family it would not be the happiest choice.	-1	Negative
However, we have to point out the poor cooperation with the Waze application via Apple Carplay.	-1	Negative
However, the solution proven over the years seems a bit outdated even in such a van.	-1	Negative
However, it is a bit problematic with the electricity, because the Tourneo disconnects it after 30 minutes after turning off the ignition.	-1	Negative
As a result, neither the refrigerator nor the water pump will work, so you cannot avoid turning on the ignition from time to time to keep everything working.	-1	Negative
The missing external socket is simply a tax for a much more affordable motorhome.	-1	Negative
No wonder, it has practically not changed since the launch of the model eight years ago.	-1	Negative
We admit that we approached him with a little apprehension.	-1	Negative
The unpleasant hum of the engine at high revs, typical of CVT transmissions, did not disappear.	-1	Negative
The biggest problem is when the wet road is added to the higher speed. In the rain, Space Star reveals its weaknesses most clearly.	-1	Negative
However, it has several fairly significant flaws that are difficult to overcome.	-1	Negative
acceleration is generally quite weak in this car due to the weak engine	-1	Negative
The electric drive does not in any way interfere with the cargo space, which thus offers the same 11 cubic meters as the standard version.	0	Neutral
First impressions after getting behind the wheel are no different from any other van.	0	Neutral
Classic analog instruments are located in front of the driver, only the tachometer has replaced the energy consumption indicator.	0	Neutral
The ID.4 uses the MEB chassis platform developed specifically for electric cars.	0	Neutral
For this, the tested Arteon was equipped with an automatic seven-speed DSG transmission.	0	Neutral
It is immediately clear that in this version it will not be a work van intended for transporting construction material or roads to the collection yard.	0	Neutral
The regular Tourneo Custom in this version carries eight passengers, but the third row of seats in our case was replaced by camping equipment.	0	Neutral
Many probably don't even know exactly what kind of car they should imagine under the name Space Star. The Japanese automaker Mitsubishi introduced the current model in 2012, and it took six more before it quietly arrived on the Slovak market.	0	Neutral
We positively evaluate the arrival of the station wagon N Line version, which looks better.	1	Positive
Overtaking in Normal mode is no big deal. Just put the "brick on the pedal" at the right moment and everything will work out.	1	Positive
The engine's reaction to pressing the gas pedal is also very good and predictable. Acceleration is easier to regulate and it is easier to prepare for an overtaking maneuver. The Hyundai i30 showed us how important a role software settings play.	1	Positive
Of the new elements, we were particularly interested in the N Line equipment, with its design and excellent seats, which we mentioned in the video.	1	Positive
An asynchronous electric motor with a maximum output of 85 kW (116 hp) and a torque of 295 Nm moves the van without the slightest problem	1	Positive
A pleasant surprise was that the range did not change too much even after loading a few wardrobes and other pieces of furniture.	1	Positive
However, this is a really interesting solution for the so-called "last mile" of parcel delivery.	1	Positive
Compared to the elongated Tiguan, the hood, as well as the front and rear overhangs, are shorter, so the car can be maneuvered better in underground garages and in narrow streets.	1	Positive
The MEB platform, in addition to helping to reduce the price of electric cars in the future (for example, Ford will also use it), is characterized by a relatively thick but flat floor	1	Positive
Precisely because of the thickness of the floor, it is ideal to mount it in an SUV, where a higher seat is welcome.	1	Positive
However, the extra kilos due to the larger battery have a positive effect on the driving characteristics of the strongest ID.4 version from the driver's point of view. The car holds nicely in corners and handles bumps well.	1	Positive
The ID.4 managed it perfectly, even at highway speeds. Simply, together with tuning the chassis, you feel that you are driving in a car of a premium brand, even without additional adaptive shock absorbers.	1	Positive
Navigation instructions are projected onto the windshield, and the car also visually informs you of nearby traffic participants, which we appreciated in the heavy rain on the highway. By then, Enyaq could easily recognize the car in front of him, even though it was lost in a cloud of droplets	1	Positive
Nevertheless, we were impressed by the LED light strip under the windshield, which changes color to help the driver while driving, for example, when navigation is turned on, it shows which way to turn or warns of the risk of a collision with a red warning light.	1	Positive
For the first time, it happened to us that the Škoda seemed more luxurious compared to the Volkswagen and did not lag behind in terms of driving characteristics.	1	Positive
Even in lower equipment, it looks more interesting, its minimalist interior is more airy and it is not afraid of unconventional solutions, including recessed handles with electric opening.	1	Positive
everything bad is also good for something	1	Positive
Even in Red Velvet with a black fake grille and silver wheels, the Enyaq looks impressive, especially from the front.	1	Positive
The first thing that greets you after opening the door is an airy interior with a very solid finish.	1	Positive
In addition, it is set deep into the dashboard, so it gives the driver a better view.	1	Positive
Despite the smaller dimensions of the screen, one cannot complain about poor readability or lack of information.	1	Positive
We have nothing to complain about the spatial aspect of Enyaq.	1	Positive
It can swallow up to 585 liters and there is no shortage of practical details, such as hinged hooks for shopping bags, a charging socket or pulls for folding the rear backrests.	1	Positive
At the same time, however, it does everything pleasantly smoothly and there is no danger of the front wheels slipping.	1	Positive
The damping of the cabin is praised, which is quite important for quiet electric cars.	1	Positive
The acoustics of the large cabin are also well managed, a slight rumble can only be heard from the wheels on a worse road surface.	1	Positive
It works great in city traffic and you can drive with a consumption of 17 kWh, which is really decent for such a large electric car.	1	Positive
I like Panda in this class for a long time, the current version of Cross still looks great.	1	Positive
The previous generation of Ignis, produced between 2003 and 2008 in Ostrihom, Hungary, was very popular in Slovakia and somehow predicted the arrival of the era of urban SUVs.	1	Positive
In addition to a slightly rougher appearance, it also brought improved technology and, for the first time, a continuously variable CVT transmission for European customers.	1	Positive
Thanks to the ground clearance of 180 mm, getting in and out is comfortable, and this also applies to the rear seats.	1	Positive
Firstly, because the door frame is wide enough, but there is also surprisingly enough space on the seats for two adults.	1	Positive
The dashboard is clear and simple, there are hard plastics everywhere, but nothing creaks anywhere.	1	Positive
However, the headlights with lens technology from Swift deserve praise.	1	Positive
Those who drive prudently and not in the brake-gas style will not mind the CVT in the Ignis, after starting up at a city speed of 50 km/h, the engine only works at surprisingly low revs.	1	Positive
The chassis setup is surprisingly solid, even with a higher body structure, the Ignis does not lean significantly in corners, and with 16-inch wheels, it manages to absorb bumps well.	1	Positive
Maybe it's a little strange, but often we can be most pleased with an affordable car. Ignis is like that and offers everything you expect from a city car.	1	Positive
The main reason for choosing this model will be the silhouette, which can be compared with a fastback in terms of elegance. The Arteon's bigger butt may fit even more.	1	Positive
The most interesting is the unusual strip of daytime running light that stretches from the lights across the entire width of the mask, interrupted only by the car company's logo.	1	Positive
If you plan to drive the Arteon in the back, you will not lack legroom, compared to a fastback, you will appreciate more headroom.	1	Positive
For an additional fee of 2,160 euros, a winter equipment package is offered, which will increase the comfort of the crew in the back the most.	1	Positive
The icing on the cake is the massage driver's seat.	1	Positive
but this time it does an excellent job, shifting smoothly and even the weaker engine does not stifle unnecessarily	1	Positive
The engine ran out of breath only at higher highway speeds, but we were most surprised by its flexibility in the city.	1	Positive
The modern diesel is one of the best that Volkswagen currently has on offer, but this is especially true of the smaller models.	1	Positive
Even in this case, however, it has its justification in the form of favorable consumption, which rose to an average of 6 liters during the test.	1	Positive
Despite the weaker engine, we enjoyed the drive the most on the highway, where the Arteon was a really undemanding car. The Travel Assist driving assistant did not hesitate even in dense fog, when we appreciated it the most.	1	Positive
The tested car also pleasantly surprised with leather seats and xenon headlights, which are not standard for vans even today.	1	Positive
After sitting behind the wheel, the driver begins to suspect that this can be a pretty nice car for trips.	1	Positive
The engine with an output of 185 hp and a torque of 415 Nm did not have the slightest problem in moving the large Tourneo, it did not lack flexibility even when moving on the highway.	1	Positive
