# Supplementary material for: Slovak morphological tokenizer using the Byte-Pair Encoding algorithm
Source: PeerJ journal article supplement (doi:10.7717/peerj-cs.2465), 2024-11-19
Supplement: SuppFiles.zip [file kinit_golden_games.xlsx]

## Sheet:  Sheet1
text	labels	label_texts
Vrtuľník je veľmi zraniteľný pri dobre mierenej streľbe zo zeme. Brániť sa, unikať, alebo vedieť zneškodniť nepriateľa je vecou sekúnd, ak nie stotín, kedy ide život.	-1	Negative
Veľmi mi v hre chýba výučba v offline režime hneď na začiatku, ktorá by bola ochotná stráviť so mnou čas a naučiť ma vrtuľníky ovládať	-1	Negative
A ani kvalita samotnej hry nie je práve najvyššia.	-1	Negative
Herci svoje úlohy síce odflákli a veľmi rýchlo zistíte, že každý tu má tak minútu dialógov	-1	Negative
Práve škoda chýb, keď mužský model postavy hovorí ženským hlasom	-1	Negative
Ešte viac to kazí už aj tak biedny dojem.	-1	Negative
Za ním stojí hlavne herná náplň, ktorá nie je ani zaujímavá, ani zábavná.	-1	Negative
Problém mesta je to, že je jednak dosť nudné, aj napriek tomu všetkému, čo v ňom je, ale zároveň jednotlivé jeho časti pôsobia veľmi genericky.	-1	Negative
Lenže ťažko si zamilujete ulice mesta, keď vás samotná hra nebaví a všetko vyzerá tak genericky.	-1	Negative
Takýchto úloh je tu 10 a majú hneď niekoľko problémov.	-1	Negative
Ale aj tie postavy, ktoré musíte voziť, často nie sú nijako zaujímavé a pri tom množstvo generických NPC si ich v hre ani nevšimnete.	-1	Negative
Takže už asi tušíte, že hra je nielen nudná, ale aj dosýta naplnená bugmi.	-1	Negative
Takže ani umelá inteligencia nie je nejaký veľký zázrak.	-1	Negative
A úprimne, znova to stojí za prd.	-1	Negative
čo v konečnom dôsledku devalvuje zážitok na občas frustrujúce nadávanie na nevyspytateľný jazdný model, kedy si auto robí čo chce	-1	Negative
Nielenže je jazdný model minimalistický, súčasti vozidiel sú statické a fyzika biedna, ale nemôžete sa ani kochať alebo si pomáhať zmenou pohľadu, aby ste sa niekam vyštverali.	-1	Negative
Svety sú pomerne prázdne, rozlohou malé, fádne a ničím nezaujímavé, hoci sem tam natrafíte na skokanský mostík, domček a podobne.	-1	Negative
Vôbec to však nefunguje, výsledný dojem je akoby úplne umelý, chýba animálnosť až drsnosť obrovských vozidiel.	-1	Negative
Takže hra vyzerá až tak obyčajne a nezaujímavo, že ťažko nájsť čokoľvek príťažlivé na jej spracovanie.	-1	Negative
hra je tak zúfalo fádna, tuctová a nezábavná, až to človeka mrzí.	-1	Negative
Scenáristický brak a poslepovanie všetkého možného robí zo zápletky Encodye nemastný a neslaný guláš.	-1	Negative
A najhoršie je, že to vôbec, ale vôbec nefunguje a hranie často skĺzne k nezáživnej nude	-1	Negative
minimálne počas prvých 3 kapitol z celkových 5, potom to všetko ide dole vodou	-1	Negative
Zásadným problémom je teda identifikácia atmosféry.	-1	Negative
Tempo hry neskutočne drhne, pretože predmety, ktoré musíte vziať, skombinovať a použiť, sa nachádzajú často na nelogických miestach.	-1	Negative
Práca level dizajnéra nespĺňa ani minimálne nároky na užívateľskú príjemnosť.	-1	Negative
Hranie je nezmyselne kúskované na behanie za rovnakými postavami – čo by nevadilo, keby dialógy s nimi neboli také patetické a únavne nudné.	-1	Negative
Kúzlo vyprchá, začnete si všímať chyby ako strnulosť, divné animácie a zostane vám jediné – pekné a statické pozadie, ktoré v neskorších fázach stratí svoje pôvodné kúzlo a je až neuveriteľne viditeľné, ako grafik z nedostatku času naplácal pár fádnych textúr na hromadu.	-1	Negative
práve užívateľská príjemnosť je na bode mrazu	-1	Negative
Priemerná známka s oboma zavretými očami je ešte lichotivým hodnotením, pretože nevyniká absolútne v ničom, zábavnosť strmo padá každou hodinou, atmosféra bledne a zúfalo nudné pobehovanie je do zeme zadupané nekonzistentným rozprávaním, ktoré je plné klišé a brakových.	-1	Negative
Nová Syberia nás totiž sklamala tam, kde sme to od pôvodne dvojdielneho dobrodružstva vôbec nečakali, a to aj celkovo v atmosfére a príbehu.	-1	Negative
Aby toho nebolo málo, riešenie problému ako takého nebýva príliš náročné, indície vám dajú menšiu nápovedu, čo máte robiť a len málokedy sa zaseknete.	-1	Negative
Niežeby po vizuálnej stránke bolo niečo so Syberiou zle, to si Sokal ustrážil, avšak rôzne technické chyby výrazne narúšajú a otravujú hrateľnosť.	-1	Negative
Nahrávanie nových lokácií trvá často dlho, pohyb nie je vždy plynulý a hra občas spadne, dokonca nám raz úplne skolabovala poškodením súboru.	-1	Negative
Synchronizácia pohybu pier s hovoreným slovom bola kritizovaná ešte pred vypustením hry a nič sa nezmenilo.	-1	Negative
Ani dabing na tom nie je práve najlepší.	-1	Negative
Čo si vyslúži maximálnu kritiku, je ovládanie.	-1	Negative
Na tieto neduhy sme nadávali pred 20 rokmi pri prvých third person akčných hrách a je to tu znova.	-1	Negative
Je to neuveriteľne otravné, neintuitívne a frustrujúce. Pri vyššie spomínaných situáciách je ponorenie sa do zápletky náročné a takmer nemožné.	-1	Negative
Zamrzí však fakt, že napriek všetkým voľbám, ktoré môžeme vykonať, nás hra navedie vždy k tomu istému koncu.	-1	Negative
Vyššie spomínané problémy sa v prípade príjemného hrania dajú prehliadnuť, ale Dreamfall Chapters v prvých troch epizódach pôsobil niekedy až frustrujúce.	-1	Negative
Vývojári sa počas písania scenára nezabudli oprieť aj o témy, ktoré rezonujú dnešným svetom. Preto sa pravidelne stretávame s otázkami xenofóbie, rasizmu či homosexuality.	-1	Negative
Hra vás dokumentárne prevedie cez obdobie prvej svetovej vojny.	0	Neutral
Encyklopédia hry je taká obsiahla, že to vyzerá, ako keby to bola druhá učebnica dejepisu.	0	Neutral
Ktokoľvek, kto sa aj len trochu vyzná v histórii, najmä tej vojenskej, vie, že vrtuľníky zažili svoju slávnu éru práve počas vojenských konfliktov vo Vietname a Afganistane.	0	Neutral
Heliborne môžeme považovať za simulátor leteckých misií s nasadením v priamych vojnových konfliktoch podľa umelého scenára, ale aj podľa skutočných udalostí, podľa toho, čo si vyberiete.	0	Neutral
Nezáleží teda na tom, či jazdíte s mužom alebo ženou, na hru to vplyv nemá	0	Neutral
Mesto nie je nejaké drobné, ale ani veľmi veľké.	0	Neutral
V mysterióznom názve Suzerain je šifrovaná virtuálna simulácia denných rutín prezidenta Rayna vo fiktívnej krajine Sordland. Krajina má svojou štruktúrou blízko k tým, ktoré po rozpade ZSSR začali hľadať svoju identitu,	0	Neutral
V úvode sa na nápaditej časovej osi dozviete podrobnosti o svojom imaginárnom živote.	0	Neutral
Suzerain je obsahovo veľmi komplexná textová hra, v ktorej okrem politických, diplomatických, vojenských a obchodných otázok riešite aj vlastnú rodinu.	0	Neutral
Tina je 9-ročná sirota, ktorá žije na streche jedného z domov so svojim robotickým ochrancom	0	Neutral
Obrovský robot stojí pri neposednom drobcovi, ktorý sa snaží pretĺkať životom	0	Neutral
V Olije ste stroskotaným kapitánom, ktorého čaká predovšetkým veľa skákania a lezenia, pretože je to 2D platformová hra.	0	Neutral
Kate sa nachádza na okraji zamrznutého jazera v kóme.	0	Neutral
Netreba dodávať, že inšpirácia sovietskym industrializmom hrá v architektúre znova prím a podľa toho to v špitáli aj vyzerá.	0	Neutral
Dej sa odohráva vo svete rozdelenom na dve časti, presnejšie Zem zasadenú do budúcnosti, v hre prezývanú Stark, a mágiou riadenú Arcadii.	0	Neutral
Náplň mnohých misií spočívala v presúvaní sa z bodu A do bodu B a naopak.	0	Neutral
Všetko je podrobne popísané, hra má veľkú encyklopédiu, menu je prehľadné.	1	Positive
Hra vás vždy prekvapí a je to dosť veľká zábava.	1	Positive
No nie všetky 2D hry sú prepadáky.	1	Positive
Na to, že hra nijako detaily nehýry a nie sú tu ani nijako špecializované efekty, vyzerá vskutku pekne	1	Positive
No najviac poteší lokalizácia do slovenčiny, vďaka ktorej hravo všetko pochopíte.	1	Positive
Vývojári z firmy Dark Fox vôbec nič nepokazili jej výrobou	1	Positive
Pre hráča, ktorý má vzťah k vojne, lietajúcim strojom a histórii vojny je táto hra zážitkom.	1	Positive
Úchvatnejšie sú ale nasadení do misií.	1	Positive
po tejto stránke je hra herným zážitkom, aký jednoducho čakáte, ak si chcete tieto stroje vychutnať	1	Positive
Na druhej strane, hra tým prekvapuje, čo všetko sa dá prepnúť, kam sa dá dostať a pod.	1	Positive
Vrtuľníky v Heliborne sú podarené. Akčné, a misie sú zábavné.	1	Positive
musím povedať, že konečne nejaká hra od Team6 aspoň dobre vyzerá a občas aj znie.	1	Positive
No a dokonca ani zvuk nie je vôbec zlý.	1	Positive
Ale nepredbiehajme, veď nápad je to celkom fajn.	1	Positive
Karoséria bežných vozidiel vylepšené o spevnenú konštrukciu a obrovské kolesá vyzerajú lákavo.	1	Positive
Príjemný štýl, primerané výzvy a špecifický svet, ktorý prebádate so svojou harpúnou, prihrávajú pozitívne body.	1	Positive
Atmosféra nás dostala, bolo to kúzelné, hoci sme sa snažili len získať závet, chceli si urobiť len svoju prácu a vrátiť sa späť do reality tvorenej televíziou.	1	Positive
Kúzelná, očarujúca, pokojná, ale zároveň fantasticky jedinečná.	1	Positive
Kočovnícky kmeň Youkolov putujúci na obrovských snežných pštrosoch ju zachraňuje pred istou smrťou	1	Positive
Prostredie ako také má špecifický Sokalov štýl a je na čo sa pozerať.	1	Positive
Hudba je znovu famózna: chorály, orchester, to všetko je skvele skombinované a dáva atmosfére epický charakter.	1	Positive
Napriek tomu, že sa vlastne na obrazovke nič nedeje, máte vďaka hudbe pocit z dobre odvedenej práce.	1	Positive
Pritom je Syberia 3 celkom zaujímavá a tiež zábavná adventúra.	1	Positive
Ragnar sa opäť ukázal ako majster bábkar.	1	Positive
Svojou rozprávačskou technikou vás vťahuje do strhujúceho príbehu a prebúdza vo vás prirodzenú zvedavosť a hlavne emócie.	1	Positive
Ukážkovo napísané dialógy stierajú skutočnosť, že postavy sú nahovorené hercami.	1	Positive
Precízne vyšliapaná cesta komplikovaným dospelým príbehom	1	Positive
Výnimkou nebola ani vynikajúca adventúra The Longest Journey, na ktorú následne nadviazal nie už toľko revolučný, ale stále vynikajúci titul Dreamfall: The Longest Journey z roku 2006.	1	Positive
A teraz sa po desiatich rokoch čakania dostávame na zavŕšenie herného príbehu, ktorý je doteraz považovaný za jeden z najlepších, aké sme v tomto žánri mohli okúsiť.	1	Positive
Príbeh je písaný pútavo a inteligentne, ale je vidieť, že autori počítajú najmä s hráčmi, ktorí už s predchádzajúcimi titulmi majú skúsenosť.	1	Positive
Rovnako sa vyrovnalo aj grafické spracovanie, ktoré niekedy poskočilo až o level vyššie a ku koncu sme dostali skutočne solídny vizuálny zážitok.	1	Positive
Priniesli dôstojné zavŕšenie hernej trilógie, ktorej prvý diel formoval žáner point'n click adventur a po príbehovej stránke sa nemajú za čo hanbiť.	1	Positive
po hernej stránke môžeme hovoriť o kvalitnom titule až od polovice	1	Positive
