# Supplementary material for: Slovak morphological tokenizer using the Byte-Pair Encoding algorithm
Source: PeerJ journal article supplement (doi:10.7717/peerj-cs.2465), 2024-11-19
Supplement: SuppFiles.zip [file kinit_golden_games.xlsx]

## Sheet:  Sheet1
text	labels	label_texts
The helicopter is very vulnerable to well-aimed fire from the ground. Defending yourself, escaping, or being able to neutralize the enemy is a matter of seconds, if not hundreds, when life goes.	-1	Negative
I really miss an offline tutorial in the game right at the beginning that would be willing to spend time with me and teach me how to fly helicopters	-1	Negative
And the quality of the game itself is not exactly the highest.	-1	Negative
The actors played their roles sloppily, and you quickly realize that everyone here has about a minute of dialogue	-1	Negative
It's a shame about the mistakes when the male character model speaks in a female voice	-1	Negative
It spoils the already poor impression even more.	-1	Negative
Behind it is mainly the gameplay, which is neither interesting nor fun.	-1	Negative
The problem with the city is that it is both quite boring, despite everything that is in it, but at the same time, individual parts of it seem very generic.	-1	Negative
But it's hard to fall in love with the city streets when you don't enjoy the game itself and everything looks so generic.	-1	Negative
There are 10 such tasks and they have several problems.	-1	Negative
But even those characters that you have to drive are often not interesting in any way, and you won't even notice a lot of generic NPCs in the game.	-1	Negative
So you can probably guess that the game is not only boring, but also full of bugs.	-1	Negative
So even artificial intelligence is not some big miracle.	-1	Negative
And honestly, it's worth a fart again.	-1	Negative
which ultimately devalues the experience to a sometimes frustrating curse at an erratic driving model where the car does whatever it wants	-1	Negative
Not only is the driving model minimalistic, the vehicle parts are static and the physics are poor, but you can't even enjoy or help yourself by changing your view to warp somewhere.	-1	Negative
The worlds are relatively empty, small in area, dull and uninteresting, although here and there you will come across a jumping bridge, a house and the like.	-1	Negative
However, it doesn't work at all, the resulting impression is completely artificial, lacking the animality and roughness of huge vehicles.	-1	Negative
So the game looks so ordinary and uninteresting that it's hard to find anything appealing to process it.	-1	Negative
the game is so desperately dull, dull and unfunny that it makes you sad.	-1	Negative
The screenplay's rubbish and the misrepresentation of everything possible makes the plot of Encodye a non-greasy and unsalted stew.	-1	Negative
And the worst thing is that it doesn't work at all, and the gameplay often slips into lifeless boredom	-1	Negative
at least for the first 3 chapters out of a total of 5, then it all goes downhill	-1	Negative
So the fundamental problem is the identification of the atmosphere.	-1	Negative
The pace of the game is incredibly jarring, as the objects you have to pick up, combine and use are often located in illogical places.	-1	Negative
The work of a level designer does not meet even the minimum requirements for user-friendliness.	-1	Negative
Gameplay is meaninglessly fragmented to run after the same characters - which would not matter if the dialogues with them were not so pathetic and tiresomely boring.	-1	Negative
The magic wears off, you start noticing bugs like stiffness, weird animations, and you're left with just a nice and static background that loses its original charm in the later stages and it's incredibly visible how the graphic designer slapped a few dull textures on a pile due to lack of time.	-1	Negative
it is the user friendliness that is at freezing point	-1	Negative
An average grade with both eyes closed is still a flattering assessment, because it does not excel at absolutely anything, the fun drops steeply every hour, the atmosphere fades and the desperately boring running around is trampled to the ground by an inconsistent narrative that is full of clichés and rubbish.	-1	Negative
New Syberia disappointed us where we did not expect it at all from the original two-part adventure, including in the overall atmosphere and story.	-1	Negative
To top it all off, solving the problem itself isn't too difficult, the clues give you a little hint of what to do, and you rarely get stuck.	-1	Negative
Lest something was wrong with Syberia from a visual point of view, Sokal guarded against that, but various technical errors significantly disrupt and annoy the gameplay.	-1	Negative
Loading new locations often takes a long time, the movement is not always smooth and the game sometimes crashes, it even completely collapsed on us once due to file corruption.	-1	Negative
The synchronization of lip movement with spoken word was criticized even before the game was released, and nothing has changed.	-1	Negative
The dubbing isn't the best either.	-1	Negative
What deserves the most criticism is the controls.	-1	Negative
We cursed these ailments 20 years ago with the first third person action games, and it's here again.	-1	Negative
It's incredibly annoying, counterintuitive and frustrating. In the above-mentioned situations, immersion in the plot is difficult and almost impossible.	-1	Negative
But it freezes the fact that despite all the choices we can make, the game always leads us to the same ending.	-1	Negative
The problems mentioned above can be overlooked if the game is enjoyable, but Dreamfall Chapters seemed frustrating at times in the first three episodes.	-1	Negative
While writing the script, the developers did not forget to rely on themes that resonate in today's world. That is why we regularly encounter issues of xenophobia, racism or homosexuality.	-1	Negative
The game takes you through the period of the First World War in a documentary way.	0	Neutral
The encyclopedia of the game is so comprehensive that it looks like a second history textbook.	0	Neutral
Anyone who knows even a little bit of history, especially military history, knows that helicopters had their heyday during the military conflicts in Vietnam and Afghanistan.	0	Neutral
We can consider Heliborne as an air mission simulator with deployment in direct war conflicts according to an artificial scenario, but also according to real events, depending on what you choose.	0	Neutral
So it doesn't matter if you ride with a man or a woman, it doesn't affect the game	0	Neutral
The city is not small, but not very big either.	0	Neutral
The mysteriously titled Suzerain is an encrypted virtual simulation of President Rayne's daily routines in the fictional country of Sordland. The structure of the country is close to those that began to search for their identity after the collapse of the USSR,	0	Neutral
In the introduction, you will learn the details of your imaginary life on an imaginative timeline.	0	Neutral
Suzerain is a very complex text game in which, in addition to political, diplomatic, military and business issues, you also deal with your own family.	0	Neutral
Tina is a 9-year-old orphan who lives on the roof of one of the houses with her robot protector	0	Neutral
A giant robot is standing next to a restless little one who is trying to fight his way through life	0	Neutral
In Olije, you are a shipwrecked captain, who mainly has a lot of jumping and climbing to do because it is a 2D platform game.	0	Neutral
Kate is found on the edge of a frozen lake in a coma.	0	Neutral
Needless to say, the inspiration of Soviet industrialism plays a direct role in the architecture again, and the hospital looks accordingly.	0	Neutral
The story takes place in a world divided into two parts, more precisely the Earth set in the future, nicknamed Stark in the game, and the magic-controlled Arcadia.	0	Neutral
The content of many missions consisted in moving from point A to point B and vice versa.	0	Neutral
Everything is described in detail, the game has a large encyclopedia, the menu is clear.	1	Positive
The game always surprises you and is quite a lot of fun.	1	Positive
Well, not all 2D games are flops.	1	Positive
Despite the fact that the game does not skimp on details and there are no specialized effects, it looks really nice	1	Positive
But the localization to Slovak will please you the most, thanks to which you will easily understand everything.	1	Positive
The developers from the company Dark Fox did not spoil anything at all with its production	1	Positive
For the gamer who has an affinity for war, flying machines and the history of war, this game is an experience.	1	Positive
But they are more impressive when deployed in missions.	1	Positive
on this side, the game is the gaming experience you simply expect if you want to enjoy these machines	1	Positive
On the other hand, the game surprises you with what can be switched, where you can get to, etc.	1	Positive
The helicopters at Heliborne are a gift. Action, and the missions are fun.	1	Positive
I have to say that finally a game from Team6 at least looks good and sometimes sounds good.	1	Positive
Well, even the sound is not bad at all.	1	Positive
But let's not get ahead of ourselves, because the idea is quite nice.	1	Positive
The body of ordinary vehicles improved with reinforced structure and huge wheels look attractive.	1	Positive
The pleasant style, reasonable challenges and the specific world that you explore with your harpoon add positive points.	1	Positive
The atmosphere got us, it was magical, although we were just trying to get a will, they just wanted to do their job and go back to the reality made up by television.	1	Positive
Magical, charming, peaceful, but at the same time fantastically unique.	1	Positive
A nomadic tribe of Youkols traveling on giant snow ostriches saves her from certain death	1	Positive
The environment as such has a specific Sokal style and is something to look at.	1	Positive
The music is again famous: the chants, the orchestra, all of it is brilliantly combined and gives the atmosphere an epic character.	1	Positive
Despite the fact that nothing is actually happening on the screen, thanks to the music you get the feeling of a job well done.	1	Positive
At the same time, Syberia 3 is quite an interesting and also fun adventure game.	1	Positive
Once again, Ragnar proved to be a master puppeteer.	1	Positive
With his storytelling technique, he draws you into a captivating story and awakens your natural curiosity and especially emotions.	1	Positive
The scripted dialogues erase the fact that the characters are spoken by actors.	1	Positive
A carefully trodden path through a complicated adult story	1	Positive
The excellent adventure The Longest Journey was no exception, which was subsequently followed by the not so revolutionary, but still excellent title Dreamfall: The Longest Journey from 2006.	1	Positive
And now, after ten years of waiting, we come to the conclusion of the game's story, which is considered to be one of the best that we could taste in this genre.	1	Positive
The story is written in an engaging and intelligent way, but it can be seen that the authors are mainly counting on players who already have experience with previous titles.	1	Positive
The graphic processing also leveled off, which sometimes jumped up to a level higher, and towards the end we got a really solid visual experience.	1	Positive
They brought a worthy conclusion to the game trilogy, the first part of which was shaped by the point'n click adventure genre, and they have nothing to be ashamed of in terms of story.	1	Positive
on the game side, we can talk about a quality title only from the middle	1	Positive
