# Supplementary material for: Slovak morphological tokenizer using the Byte-Pair Encoding algorithm
Source: PeerJ journal article supplement (doi:10.7717/peerj-cs.2465), 2024-11-19
Supplement: SuppFiles.zip [file kinit_golden_mobiles.xlsx]

## Sheet:  Sheet1
text	labels	label_texts
Je tu pár nepríjemností, ktoré vyplývajú z jej designu.	-1	Negative
Po prvé, nedokážete si ju pekne postaviť a vybrať slúchadlá zhora.	-1	Negative
To je pre mňa veľká nevýhoda, pretože som zvyknutý na jednoduchší dizajn u mojich Hayl GT1.	-1	Negative
Už rovno môžeme zabudnúť na používanie jednou rukou (chytím rukou krabičku a rovnakou rukou z nej vytiahnem slúchadlá).	-1	Negative
Škoda, že slúchadlá neponúkajú v tomto smere niečo navyše – ovládanie hlasitosti posúvaním prsta po „stonke“ slúchadiel alebo prepínanie medzi piesňami trojitým kliknutím.	-1	Negative
nebol to veľmi príjemný zážitok. Mne hlas osoby na druhej strane vypadával každé tri sekundy na pár milisekúnd a podľa spätnej väzby volajúceho sa niečo podobné dialo aj na opačnom konci.	-1	Negative
Vyskúšate 4 ďalšie mobily od rôznych výrobcov vrátane Huawei, len aby ste zistili, že nič nepomáha.	-1	Negative
Aplikácia mimochodom nie je nič extra a zaobídete sa aj bez nej.	-1	Negative
Avšak chýba mu výraznosť a živosť stredov - skrátka potrebujú vylepšiť dynamický rozsah. Tiež hĺbky sú tu sporné, pri inštrumentálnej hudbe je sotva cítiť, zatiaľ čo pri rape a elektronickej hudbe prevažujú.	-1	Negative
Pokiaľ to mám prirovnať k žánrom a štýlu hudby, tak tieto slúchadlá nie sú vhodné pre žánre ako pop alebo rock.	-1	Negative
Chýbali mi tu dodatočné nastavenia sily ANC alebo ambientného módu, k tomu sa ešte dostaneme. Pretože aplikácia toho veľa neponúka ako ste si mohli všimnúť vyššie.	-1	Negative
Smutné je, že ani pri takmer 150€ Huawei FreeBuds Pro nedostanete tieto pokročilé nastavenia, ktoré ponúka napr. Samsung u Galaxy Buds+. Huawei FreeBuds 4i stojí iba polovicu z toho, takže sa to dá prežiť ľahšie.	-1	Negative
Čo mi však vyhovuje menej, sú super silné magnety, vďaka ktorým spolu s okrúhlym dizajnom slúchadiel bránia vo vybratí slúchadiel z krabičky.	-1	Negative
Trochu mi prekáža biedna aplikácia a mierne komplikovanejší spôsob inštalácie.	-1	Negative
Menšie nepríjemnosti zažijete aj v oblasti hudby, pokiaľ máte citlivé ucho na tóny	-1	Negative
Pokiaľ cez ne plánujete telefonovať, tak to môže byť trochu nepríjemné, pretože sa z času na čas vyskytujú výpadky vášho hlasu alebo hlasu druhej strany.	-1	Negative
Slúchadlá v základnom balení však nenájdete.	-1	Negative
Škoda je, že aj keď Samsung svoj šikovný telefón prezentuje aj s podporou 25W nabíjania, adaptér s potrebným výkonom, na rozdiel od niektorých iných výrobcov, do krabice nepribalil.	-1	Negative
Ako nevýhodu hodnotím klznosť matného povrchu av tomto prípade by som zvolil tenký priesvitný kryt.	-1	Negative
Oproti predchodcom sú mínusom chýbajúce slúchadlá v balení.	-1	Negative
Čo sa mi nepáčilo bol vibračný motorček. Vibrácie aspoň mne osobne neučarovali a pripadali mi trochu lacno.	-1	Negative
Podporu 5G sietí tu nenájdeme.	-1	Negative
V tme to už až také dobré nebolo a fotky boli tmavé, neostré a bez detailov.	-1	Negative
Samozrejme tu je cítiť aj absenciu optickej stabilizácie obrazu.	-1	Negative
Ako som už spomínal, za nízku kvalitu nočných fotografií môže aj chýbajúca optická stabilizácia pre tento snímač.	-1	Negative
Jediným mínusom sú v tomto prípade hlavne väčšie rámčeky okolo displeja a tým druhým jeden chýbajúci slot na SIM karty.	-1	Negative
Predchádzajúcim modelom chýbala napríklad vodeodolnosť, bezdrôtové nabíjanie či fotoaparát, ktorý by sa mohol porovnávať s tými najlepšími.	-1	Negative
Nenechajte sa oklamať peknými slovami.	-1	Negative
Konštrukcia nie je spracovaná kvalitne.	-1	Negative
Na celkovom dizajne ma najviac štve lesklá zadná strana, ktorá je doslova magnetom na odtlačky prstov.	-1	Negative
Použitie ochranného krytu samozrejme tento nedostatok neodstráni.	-1	Negative
Jediným menším nedostatkom môže byť umiestnenie snímača, ktoré je pomerne nízko.	-1	Negative
Avšak odomykanie tvárí nie je tak bezpečné ako odomykanie prstom	-1	Negative
Na moje nemilé prekvapenie tomu nie je úplne tak.	-1	Negative
Novinke chýba možnosť rozšíriť úložisko pamäťovou kartou.	-1	Negative
Avšak 256 GB úložiska môže byť stále nedostačujúce	-1	Negative
Trochu mi tu chýba konzistentnosť kvality fotiek	-1	Negative
Nepoteší ani to, že video dokáže natáčať len vo FHD rozlíšení	-1	Negative
video tak dobre stabilizované nie je	-1	Negative
To už na dnešné pomery nijako neohromí.	-1	Negative
Nedostatkom môže byť kapacita úložiska, pre niekoho bude 256 GB málo	-1	Negative
Problémom je aj Ambientný režim, ktorý si dokáže vziať viac energie, než by som očakával.	-1	Negative
Ďalším problémom je, že tento systém neponúka spôsob, ako súbory v koši jednoducho obnoviť.	-1	Negative
Android 12 prinesie funkciu Kôš, má to však háčik	-1	Negative
Huawei iba včera oficiálne predstavil nové dostupné Bluetooth slúchadlá FreeBuds 4i.	0	Neutral
My sme mali možnosť tieto slúchadlá testovať ešte pred ich oficiálnym predstavením.	0	Neutral
Krabička má tvar a rozmery bežného priemerná vajíčka o veľkosti M.	0	Neutral
O tom, aký tento šikovný telefón naozaj je, sa dočítate v tejto recenzii.	0	Neutral
Hlavný snímač má rozlíšenie 64 megapixelov a svetelnosť f/1.8.	0	Neutral
Ďalší zo zvyšných dvoch objektívov je hĺbkový snímač s rozlíšením 5 megapixelov a makro snímač, aj s rozlíšením 5 megapixelov.	0	Neutral
Aplikácia fotoaparátu je pochopiteľne rovnaká, ako na všetkých Samsung smartfónoch s nadstavbou One UI 3.1	0	Neutral
Pri spustení aplikácie sú dostupné skratky pre tri režimy, medzi ktoré patrí ZÁBAVA, JEDNOTLIVÉ SNÍMANIE, FOTOGRAFIA, VIDEO a skratka ĎALŠIE.	0	Neutral
Ak by ste chceli väčší výkon a podporu 5G sietí v tele tohto smartfónu, je tu pre vás aj Samsung Galaxy A52 5G	0	Neutral
Spoločnosť sa už nesnaží vyrábať zabijakov vlajkových lodí, prešla do režimu plnohodnotných vlajkových lodí za vysoké ceny.	0	Neutral
Áno, presne toto sú výrobcovia, ktorých vlajkové lode môžeme smelo porovnávať s novou vlajkou od OnePlus.	0	Neutral
Chvíľu som bol vlastníkom nového iPhonu 12 Pro Max a teraz používam Galaxy S21 Ultra.	0	Neutral
Ľavá strana obsahuje dvojtlačidlo ovládania hlasitosti	0	Neutral
tento dizajn jej umožňuje skvele padnúť do ruky a udržiavať si kapacitu 215 mAh bez toho, aby bola príliš veľká.	1	Positive
Teda ak nemáte zariadenie značky Huawei. Vtedy je všetko v poriadku.	1	Positive
Poteším fanúšikov hip hopu a rapu, pretože tí si užijú basovejšiu muziku. Napríklad Eminemov Rap God je celkom úderný, ako by to malo byť, ale aj tu je počuť stratu tónov stredného rozsahu.	1	Positive
Skvele znejú popové piesne a viac hlasovo orientované piesne.	1	Positive
Aktívne potlačenie zvukov okolia (ANC) funguje veľmi dobre na monotónne a skôr hlbšie tóny.	1	Positive
Slúchadlá sú dobre skonštruované a ten vajíčkový dizajn mi úplne vyhovuje.	1	Positive
Slúchadlá inak ponúkajú veľmi dobrú výdrž na jedno nabitie - 10 hodín hrania bez ANC.	1	Positive
Avšak zároveň je to výhoda pre menej zdatných používateľov, ktorí to s elektronikou až tak nevedia.	1	Positive
Všetkým ostatným bude ich zvuk vyhovovať.	1	Positive
Ponúkajú kompaktnejší dizajn slúchadiel aj krabičky a pritom si zachovávajú podobnú výdrž na jedno nabitie.	1	Positive
Jednoznačnou výhodou je aplikácia Galaxy Wearable.	1	Positive
Prvými boli modely z radu Galaxy S21, ktoré priniesli špičkový čipset a perfektnú zostavu fotoaparátov.	1	Positive
Prvý dojem zo spracovania tohto smartfónu bol výborný.	1	Positive
Samsung opäť dokazuje, že k výbornému vzhľadu už nie je potrebné sklo.	1	Positive
Matný plast na zadnej strane smartfónu pôsobí minimalistickým, ale luxusným dojmom.	1	Positive
Tá, na to že sa nejedná o ultrasonickú verziu, fungovala veľmi rýchlo a presne a nemám sa na čo sťažovať.	1	Positive
Čo sa týka displejov sú chytré telefóny od Samsungu špička. Pozorovacie uhly a sýtosť farieb sú skvelé.	1	Positive
Na displej sa bezproblémovo pozerá aj na priamom slnku, ale mne osobne by sa hodil ešte o trošku vyšší jas.	1	Positive
Nechýba ani Always On Display, ktorý spolu s One UI 3.1 ponúkne nové štýly hodín a zobrazovanie notifikácií.	1	Positive
Pozitívne hodnotím aj fungovanie a promptnosť automatickej úpravy jasu displeja, ktorá pri prechode z rôzne osvetleného prostredia upravila jas tak, ako mala.	1	Positive
Rovnako bolo bezproblémové aj hranie hier, či už tých náročnejších alebo menej náročných.	1	Positive
Aplikácie v nej zostávali otvorené ešte dlho po ich minimalizovaní, čo hodnotím pozitívne.	1	Positive
Vďaka tejto nadstavbe ponúkne chytrý telefón množstvo zaujímavých funkcií a možností prispôsobenia, ktoré by čistý Android neponúkol.	1	Positive
Ako som už spomínal vyššie, počas testovania som nezaznamenal takmer žiadne záseky a ani žiadny systémový bug.	1	Positive
Animácie boli vždy plynulé a bežný používateľ sa nemá na čo sťažovať.	1	Positive
Systém sám o sebe je pekný a prehľadný, domovská obrazovka ponúka množstvo nastavení, či už sú to rôzne zmeny vzhľadu, tém, balíky ikon, zmeny veľkosti mriežky ikon a rôzne iné nastavenia.	1	Positive
Vďaka nim si používateľ dokáže vybrať to, čo mu najviac vyhovuje.	1	Positive
Nielen že nechýba 3,5 mm audio jack, ale pridanú hodnotu mu dávajú aj stereo reproduktory.	1	Positive
Tie hrajú naozaj veľmi slušne a hlasno.	1	Positive
Nechýbajú ani rôzne nastavenia zvuku od tých najbežnejších, cez funkcie Dolby Atmos a nastavenia kvality zvuku, až po ekvalizér. Je ich tam jednoducho dostatok na to, aby ste si zvuk prispôsobili podľa seba.	1	Positive
Samsung Galaxy A52 je na tom čo sa týka konektivity jednoznačne dobre.	1	Positive
Samozrejmosťou je podpora 5 GHz WiFi sietí, Bluetooth 5.0, NFC a GPS. Signál mobilnej siete hodnotím ako dostačujúce a rovnako tak hodnotím aj silu signálu WiFi v prípade oboch frekvencií.	1	Positive
Samsung Galaxy A52 prináša pokrok aj čo sa týka fotografií	1	Positive
Farby boli krásne živé, pestré a neboli zbytočne presaturované.	1	Positive
Vďaka optickej stabilizácii stúpla kvalita fotografií zhotovených v tmavšom prostredí.	1	Positive
istotou môžem povedať, že patrí medzi tie lepšie a na jeho výsledné fotografie zhotovené počas dňa sa nemôžem sťažovať.	1	Positive
Bezproblémovo funguje aj portrétny režim, ktorý v spolupráci so systémom presne vie, ktorú časť scény rozmazať a ktorú nie.	1	Positive
S rýchlosťou aplikácie a prepínanie fotoaparátov problém nebol.	1	Positive
Ako som už spomínal, dva dni výdrže vôbec nie sú problém.	1	Positive
Samsung Galaxy A52 jednoznačne hodnotím ako podarené zariadenie, ktoré má oproti predchodcom čo ponúknuť.	1	Positive
Smartfón ako celok hodnotím kladne a som si istý, že jeho kúpou nič nepokazíte.	1	Positive
V porovnaní s konkurenčnými vlajkovými loďami má OnePlus výhodu.	1	Positive
Balenie sa môže pochváliť sa môže aj celkom slušne vyzerajúcim ochranným obalom.	1	Positive
Za ochranný kryt som osobne veľmi rád a teší ma aj prítomnosť nabíjačky v balení.	1	Positive
V prvom rade som príjemne prekvapený „kompaktnosťou“ zariadenia.	1	Positive
Avšak v porovnaní s vyššie spomínanými modelmi pôsobí príjemným kompaktným dojmom.	1	Positive
Nielenže celkové rozmery sú menšie, pomáha tomu aj celkom výrazné zahnutie zadnej strany k okrajom.	1	Positive
Telefonovanie je bezproblémové, kvalitný reproduktor nad displejom zaistí čistý a hlasný zvuk.	1	Positive
Fotoaplikáciu musím jednoznačne pochváliť za rýchlosť.	1	Positive
Poteší rýchle a presné ostrenie a dynamický rozsah je výborný, ale Samsung je v tomto smere ešte o trochu ďalej	1	Positive
Nočné fotografie nie sú vôbec zlé.	1	Positive
Inak nemám novému OnePlus 9 Pre moc čo vyčítať a jeho kúpou určite neurobíte chybu.	1	Positive
