# Supplementary material for: Slovak morphological tokenizer using the Byte-Pair Encoding algorithm
Source: PeerJ journal article supplement (doi:10.7717/peerj-cs.2465), 2024-11-19
Supplement: SuppFiles.zip [file kinit_golden_mobiles.xlsx]

## Sheet:  Sheet1
text	labels	label_texts
There are a few inconveniences that result from its design.	-1	Negative
First, you can't stand it up nicely and remove the headphones from the top.	-1	Negative
This is a big drawback for me as I'm used to a simpler design on my Hayl GT1s.	-1	Negative
We can immediately forget about using it with one hand (I grab the box with my hand and take out the headphones with the same hand).	-1	Negative
It's a shame that the headphones don't offer something extra in this regard - volume control by sliding your finger along the "stem" of the headphones or switching between songs with a triple click.	-1	Negative
it was not a very pleasant experience. For me, the voice of the person on the other end dropped out every three seconds for a few milliseconds, and according to the caller's feedback, something similar happened on the other end as well.	-1	Negative
You try 4 other mobiles from different manufacturers including Huawei only to find that nothing helps.	-1	Negative
By the way, the application is nothing extra and you can do without it.	-1	Negative
However, it lacks expressiveness and vibrancy in the mids - in short, they need to improve the dynamic range. Also, the depths are questionable here, with instrumental music it is barely felt, while with rap and electronic music they prevail.	-1	Negative
If I compare it to genres and styles of music, these headphones are not suitable for genres like pop or rock.	-1	Negative
I missed additional ANC strength settings or ambient mode here, we'll get to that later. Because the application does not offer much, as you may have noticed above.	-1	Negative
It's sad that even with the almost €150 Huawei FreeBuds Pro, you won't get these advanced settings offered by e.g. Samsung at Galaxy Buds+. The Huawei FreeBuds 4i costs only half that, so it's easier to live with.	-1	Negative
However, what I'm less comfortable with are the super strong magnets, which, along with the round design of the headphones, prevent the headphones from being removed from the box.	-1	Negative
I'm a bit bothered by the poor application and slightly more complicated installation method.	-1	Negative
You will also experience minor inconveniences in the field of music, if you have a sensitive ear for tones	-1	Negative
If you plan to make a phone call through them, it can be a bit annoying, because your voice or the other party's voice drops out from time to time.	-1	Negative
However, you will not find headphones in the basic package.	-1	Negative
It's a shame that even though Samsung presents its smart phone with support for 25W charging, it didn't pack an adapter with the necessary power in the box, unlike some other manufacturers.	-1	Negative
I consider the slipperiness of the matte surface to be a disadvantage, and in this case I would choose a thin translucent cover.	-1	Negative
Compared to its predecessors, the lack of headphones in the package is a minus.	-1	Negative
What I didn't like was the vibrating motor. The vibrations, at least for me personally, didn't charm me and they felt a bit cheap.	-1	Negative
We will not find support for 5G networks here.	-1	Negative
It was not so good in the dark and the photos were dark, blurry and without details.	-1	Negative
Of course, there is also the absence of optical image stabilization.	-1	Negative
As I already mentioned, the lack of optical stabilization for this sensor can also be responsible for the low quality of night photos.	-1	Negative
The only downside in this case is mainly the larger frames around the display and the second is the missing SIM card slot.	-1	Negative
Previous models lacked, for example, water resistance, wireless charging or a camera that could be compared with the best.	-1	Negative
Don't be fooled by nice words.	-1	Negative
The construction is not well made.	-1	Negative
What annoys me the most about the overall design is the glossy back, which is literally a magnet for fingerprints.	-1	Negative
Of course, the use of a protective cover does not eliminate this shortcoming.	-1	Negative
The only minor drawback may be the location of the sensor, which is relatively low.	-1	Negative
However, face unlock is not as secure as finger unlock	-1	Negative
To my unpleasant surprise, this is not entirely the case.	-1	Negative
The novelty lacks the option to expand the storage with a memory card.	-1	Negative
However, 256 GB of storage may still be insufficient	-1	Negative
I'm a bit lacking in the consistency of the photo quality here	-1	Negative
The fact that it can record video only in FHD resolution is also not pleasing	-1	Negative
the video is not so well stabilized	-1	Negative
This is no longer surprising by today's standards.	-1	Negative
The storage capacity may be a drawback, for some 256 GB will be insufficient	-1	Negative
Ambient mode is also a problem, which can take more power than I would expect.	-1	Negative
Another problem is that this system doesn't offer a way to easily restore files in the Recycle Bin.	-1	Negative
Android 12 will bring the Recycle Bin feature, but there's a catch	-1	Negative
Only yesterday, Huawei officially presented the new affordable Bluetooth headphones FreeBuds 4i.	0	Neutral
We had the opportunity to test these headphones even before their official presentation.	0	Neutral
The box has the shape and dimensions of an average M size egg.	0	Neutral
You can read about how smart this phone really is in this review.	0	Neutral
The main sensor has a resolution of 64 megapixels and an aperture of f/1.8.	0	Neutral
Another of the remaining two lenses is a depth sensor with a resolution of 5 megapixels and a macro sensor, also with a resolution of 5 megapixels.	0	Neutral
The camera application is of course the same as on all Samsung smartphones with the One UI 3.1 superstructure	0	Neutral
Shortcuts for three modes are available when you launch the app, which include FUN, SINGLE SHOT, PHOTO, VIDEO, and the NEXT shortcut.	0	Neutral
If you would like more performance and support for 5G networks in the body of this smartphone, the Samsung Galaxy A52 5G is also here for you	0	Neutral
The company is no longer trying to make flagship killers, it has gone into full flagship mode at high prices.	0	Neutral
Yes, these are exactly the manufacturers whose flagships we can safely compare with the new flagship from OnePlus.	0	Neutral
I was the owner of the new iPhone 12 Pro Max for a while and now I use the Galaxy S21 Ultra.	0	Neutral
The left side contains two volume control buttons	0	Neutral
this design allows it to fit perfectly in the hand and maintain a capacity of 215 mAh without being too large.	1	Positive
That is, if you do not have a Huawei brand device. Then everything is fine.	1	Positive
I will please the fans of hip hop and rap, because they will enjoy more bass music. For example, Eminem's Rap God is quite punchy, as it should be, but even here you can hear the loss of midrange notes.	1	Positive
Pop songs and more vocal oriented songs sound great.	1	Positive
Active noise cancellation (ANC) works very well for monotonous and rather deeper tones.	1	Positive
The headphones are well built and the egg design suits me perfectly.	1	Positive
Otherwise, the headphones offer a very good endurance on one charge - 10 hours of playing without ANC.	1	Positive
However, at the same time, it is an advantage for less skilled users who do not know much about electronics.	1	Positive
Everyone else will be fine with their sound.	1	Positive
They offer a more compact design of the headphones and the box, while maintaining a similar endurance per charge.	1	Positive
A clear advantage is the Galaxy Wearable application.	1	Positive
The first were models from the Galaxy S21 series, which brought a top chipset and a perfect set of cameras.	1	Positive
The first impression of the processing of this smartphone was excellent.	1	Positive
Samsung proves once again that glass is no longer necessary for a great look.	1	Positive
The matte plastic on the back of the smartphone gives a minimalist but luxurious impression.	1	Positive
Although it is not an ultrasonic version, it worked very quickly and accurately and I have nothing to complain about.	1	Positive
When it comes to displays, Samsung smartphones are top notch. Viewing angles and color saturation are great.	1	Positive
The display can be viewed without any problems even in direct sunlight, but I personally would like a slightly higher brightness.	1	Positive
There is also Always On Display, which together with One UI 3.1 will offer new clock styles and display notifications.	1	Positive
I also positively evaluate the functioning and promptness of the automatic brightness adjustment of the display, which adjusted the brightness as it should when changing from a differently lit environment.	1	Positive
Playing games, whether more demanding or less demanding, was also trouble-free.	1	Positive
The applications in it remained open for a long time after minimizing them, which I evaluate positively.	1	Positive
Thanks to this extension, the smartphone will offer a number of interesting functions and customization options that pure Android would not offer.	1	Positive
As I mentioned above, I experienced almost no crashes and no system bugs during testing.	1	Positive
The animations have always been smooth and the average user has nothing to complain about.	1	Positive
The system itself is nice and clean, the home screen offers a lot of settings, be it different skin changes, themes, icon packs, icon grid resizing and various other settings.	1	Positive
Thanks to them, the user can choose what suits him best.	1	Positive
Not only is there a 3.5 mm audio jack, but stereo speakers also give it added value.	1	Positive
They play really well and loudly.	1	Positive
There are also various sound settings, from the most common ones, through Dolby Atmos functions and sound quality settings, to the equalizer. There are simply enough of them to customize the sound to your liking.	1	Positive
The Samsung Galaxy A52 is clearly good when it comes to connectivity.	1	Positive
It goes without saying that it supports 5 GHz WiFi networks, Bluetooth 5.0, NFC and GPS. I evaluate the signal of the mobile network as sufficient, and I also evaluate the strength of the WiFi signal in the case of both frequencies.	1	Positive
The Samsung Galaxy A52 also brings progress in terms of photos	1	Positive
The colors were beautifully vivid, colorful and not unnecessarily oversaturated.	1	Positive
Thanks to optical stabilization, the quality of photos taken in a darker environment has increased.	1	Positive
I can say for sure that it is one of the better ones and I can't complain about the resulting photos taken during the day.	1	Positive
The portrait mode also works without problems, which in cooperation with the system knows exactly which part of the scene to blur and which not.	1	Positive
There was no problem with the speed of the application and switching cameras.	1	Positive
As I already mentioned, two days of endurance is not a problem at all.	1	Positive
clearly rate the Samsung Galaxy A52 as a successful device that has a lot to offer compared to its predecessors.	1	Positive
I rate the smartphone as a whole positively and I'm sure that you won't go wrong by buying it.	1	Positive
Compared to rival flagships, OnePlus has an edge.	1	Positive
The packaging can also boast of a pretty decent-looking protective packaging.	1	Positive
I am personally very happy with the protective cover and I am also pleased with the presence of the charger in the package.	1	Positive
First of all, I am pleasantly surprised by the "compactness" of the device.	1	Positive
However, compared to the above-mentioned models, it has a pleasant compact impression.	1	Positive
Not only are the overall dimensions smaller, this is also helped by the quite significant bending of the back side towards the edges.	1	Positive
Phone calls are trouble-free, the high-quality speaker above the display ensures clear and loud sound.	1	Positive
I must definitely praise the photo application for its speed.	1	Positive
Fast and accurate focusing is pleasing, and the dynamic range is excellent, but Samsung is still a little further in this direction	1	Positive
Night photos are not bad at all.	1	Positive
Otherwise, I don't have much to complain about the new OnePlus 9 Pro, and you definitely won't make a mistake by buying it.	1	Positive
