# Supplementary material for: Slovak morphological tokenizer using the Byte-Pair Encoding algorithm
Source: PeerJ journal article supplement (doi:10.7717/peerj-cs.2465), 2024-11-19
Supplement: SuppFiles.zip [file kinit_golden_movies.xlsx]

## Sheet:  Sheet1
text	labels	label_texts
Problém ale tkvie v tom, že Jak v bavlnke má až dve hodiny, pričom sa mohlo ešte trochu strihať. Z výsledku by som vyhodil približne pätnásť minút, aby si tento žánrový hybrid udržal výraznejšie dynamo.	-1	Negative
Nanešťastie, tematika zostáva po (relatívne seriózne, očakávane cynické a morálne odpudivé) prvej polhodine v pozadí.	-1	Negative
Film, ktorý má hodinu a pol, pričom sa tam 70 minút rieši zrod a posledné minúty sú venované prijatiu schopností, zodpovednosti za svoje činy a aj finálny súboj je potom skôr zlý sen.	-1	Negative
Film je ale neuveriteľne nudný a neoriginálny.	-1	Negative
Film totiž nie je silný, kde by mal byť a ukazuje naplno organizačné a kreatívne zlyhanie. Je to trochu škoda, pretože som sa na postavy veľmi tešil.	-1	Negative
O druhom z tejto dvojice sa to však už nedá tvrdiť a výsledkom tohto neúspechu, ktorý štúdio Paramount Pictures nezmyselne zvádzalo na vtedajší priemerne prijatý Tomb Raider: The Angel of Darkness, bol pätnásťročný hiatus.	-1	Negative
Vyčítať by sa naopak dal skratkovitý úvod na ostrove as ním súvisiaci pomerne rýchly prerod ústrednej postavy.	-1	Negative
Byť tínedžerkou skrátka nie je nič jednoduché a to ani pre ľudí v jej okolí.	-1	Negative
Občianska vojna v Juhoslávii patrila k mimoriadne krvavým konfliktom konca dvadsiateho prvého a začiatku dvadsiateho storočia.	-1	Negative
Celková uveriteľnosť je však už problematickejšia a to hlavne preto, ako prudko dokážu niektorí jednotliví protagonisti reagovať na niektoré podnety.	-1	Negative
Najväčší problém mám so samotným finále filmu, ktoré je rovnako ako v prípade predchádzajúcich filmového z DC univerza nehorázne chaotické a akoby vystrihnuté z iného filmu.	-1	Negative
Tvorcovia sa však s námetom nepopasovali úplne najlepšie a očividne z toho chceli vyťažiť niečo viac.	-1	Negative
Denzel aj Viola môžu hrať ako z partie pokojne aj celý deň, ale čo sa samotného filmu týka, ľutujem, že som sa do neho vôbec pustila. konverzacky a silné príbehy milujem, ba priamo vyhľadávam, ale toto bolo utrpenie	-1	Negative
príšerná amatérčina. po všetkých stránkach. herecké, režiserské, scenaristické a hlavne logické. v tomto filme sa stretlo všetko zle a trápne klisne z lacných bečiek a cečiek.	-1	Negative
inak to bola strašná, doneba volajúca kravina. každou minútou mi to zrelo nervy. doslova. ešte doteraz má bolí oči z tých debilných hereckých výkonov a komediálnych nelogickostí.	-1	Negative
kiná som odišla absolútne frustrovaná. pokiaľ Revenant vyhraje, po Birdmanovi to bude najhorší film v dejinách Oscarov, ktorý si odnesie hlavnú cenu.	-1	Negative
dementnejší film som dávno nevidela. dávam sama sebe „like“, že som to vôbec dohliadala do konca, pretože toto teda bolo naozaj niečo. bohužiaľ v tom negatívnom zmysle	-1	Negative
ľutujem tri stratené hodiny môjho života. vyvarujte sa prosím rovnakej chybe.	-1	Negative
Hlučná a bezbrehého stupídna nonstop marovačka z dimenzie, kde je všetko možné, takže Milla Jovovich hrá ešte horšie ako obvykle	-1	Negative
Šialene nesympatické postavy v príbehu, ktorý sa po dvoch celkom dynamických a napínavých epizódach rozgebrí na otravne ukecanú a ufňukanú soap operu	-1	Negative
takže to má šialene stupídnu zápletku s akousi živou verziou Arabelinho prsteňa, bla-bla dialógy, zmätených predstaviteľov, zúfalých zloduchov a veľmi zle natočené akčné scény s lacnými trikmi.	-1	Negative
Taký hlúpy a vo všetkom nefunkčný film som už dlho nevidel.	-1	Negative
Nie, nie je to dobrý film, je to šialene nudná a prázdna zlátanina, ktorá bolestivo netrafuje to, čo evidentne malo byť hlavnou pointou – teda zachytiť akýsi zlomový okamih či vzťah v Mankovom živote, ktorý viedol k napísaniu Občana Kanea.	-1	Negative
Vlastne ma to príliš neoslovilo - ani tým ako animovaným vizuálom, ani príbehom. Mohlo to byť niečo ako realistické Inglorious Basterds, ale dej je rozhádzaný, epizodický, nedokáže vtiahnuť a dostatočne spojiť diváka s postavami, nemá to ten epický ťah	-1	Negative
Nie je to veľmi dobrý film (ani výpravou, ani scenárom)	-1	Negative
Vlastne nič extra, dohliadol som len preto, že si udržujem prehľad v týchto historických veciach	-1	Negative
toto sa už vážne nedalo, dokonca som premýšľal o odpade	-1	Negative
Toto je šialene nezvládnutý scenáristický guláš, v ktorom som sa nedokázal zorientovať, kto je kto, o čo tam vlastne ide, kde začína a končí virtuálna realita, kto je nové telo jej postavy z 1. sezóny... a vôbec, prečo by som na to mal pozerať	-1	Negative
za mňa najstupídnejší film tohto roku	-1	Negative
len škoda, že tvorcovia až príliš očividne predhadzujú náznaky „šokujúce“ pointy. A Worthington to herecky príliš nedáva.	-1	Negative
Toto sa fakt hrubo nepodarilo. Celý dej je zlátanina s hromadou nelogických failov a idiotských skratiek.	-1	Negative
Zápletka béčková, napätie žiadne, akcie málo, záporáci slabí, aj ten oldschool feeling z jednotky je preč.	-1	Negative
toto je zúfalstvo, ktoré ich evidentne nebavilo. Ako keby už priamo na pľac chodili s tým, že natáčajú zbytočnosť, ktorá sa pôvodnému filmu v ničom nevyrovná.	-1	Negative
Pár slušných ľakačiek ak tomu nudný scenár a nesympatickí herci.	-1	Negative
Má to úplne debilný príbeh, celá tá zápletka je príšernosť, zasadenie do historického kontextu zbytočné a nefunkčné. Celý film nemá ani náznak nadhľadu, nieto ešte humoru	-1	Negative
Iste, od adaptácie počítačovej hry ťažko čakať dobrý príbeh, ale toto je to najnudnejšie fantasy bla-bla, aké si len dokážete predstaviť.	-1	Negative
Niektoré scény sú úplne zle a neviem sa úplne rozhodnúť, či je to herci alebo réžiou alebo aj tým, aj tým.	-1	Negative
Hvoreckého mysteriózna dobová detektívka pretavená do stupídnej a kŕčovitej "komédie" plnej hrozných "vtipov" a neznesiteľných hercov (s odporne namachrovaným Macháčkom na čele).	-1	Negative
Scenár nie je úplne márny, ale natočené je to fakt nezáživne a herci sa celý čas tvária, že sa tohto projektu zúčastňujú za trest.	-1	Negative
súčasnej dobe máte aj zásluhou digitálnych predplatných služieb na výber z desiatok a desiatok rôznych filmov. Naozaj, nájdete si takmer čokoľvek z akéhokoľvek žánru	0	Neutral
Namiesto cestovania po svete a objavovania hrobiek snaží žiť bežný život v Londýne a zo zásady odmieta prevziať spoločnosť svojho otca, ktorý pred siedmimi rokmi záhadne zmizol.	0	Neutral
Raz za čas sa na scéne zjaví film ako Lady Bird, ktorý sa nesnaží poukazovať na problémy dnešného sveta, nenúti diváka zamýšľať sa nad jeho nespravodlivosťou, napriek tomu sa nedá tvrdiť, že v sebe neskrýva žiadnu hĺbku.	0	Neutral
Sám sa profiloval skôr ako dokumentarista a svoj debutový Karneval z roku 2006 venoval tematike nezákonného vyhostenia bosnianskych utečencov z Čiernej Hory.	0	Neutral
Keďže ide o prvú sólovku Wonder Woman, je hrdinku najprv treba predstaviť. Síce sme sa s touto postavou už stretli, z jej minulosti sme toho veľmi nevedeli.	0	Neutral
Prvý superhrdinský film, v ktorom je hlavnou hrdinkou žena, zrežírovala Patty Jenkins.	0	Neutral
Celé sa to odohráva v niekoľkých časových rovinách, ktoré sú od seba vzdialené aj desiatky rokov, čo umožňuje spracovať jednotlivé poviedky	0	Neutral
preto som minimálne rád, keď sa mi pod ruky (alebo pred oči?) dostane niečo nové	1	Positive
Predsa len, kreatívne pero dokáže prekvapiť. Nie raz, nie dvakrát, ale naprieč celou snímkou opakovane a efektívne.	1	Positive
Hereckou kráľovnou je nepochybne Rosamund Pike, ktorá je desať úrovní nad akýmkoľvek iným hercom alebo herečkou vo filme.	1	Positive
Primárne je pozornosť uprená na postavu Rosamund av konkrétnych momentoch ju sekunduje Dinklage. A ono to prekvapivo funguje.	1	Positive
Ako v bavlnke je nadmieru zábavným neo thrillerom s relevantnou obsahovou hodnotou, adekvátnym technickým spracovaním, výbornou Rosamund a aktuálnym sociálnym presahom, za ktorý sa tradične rozdávajú sošky alebo minimálna nominácia (posledné dva filmy J. Peeleho).	1	Positive
Scenár je relatívne šikovný, správne nepríjemný, zvrátený av zásade v ňom nenájdete jedinú postavu, s ktorou by ste sa chceli alebo mohli stotožniť	1	Positive
Priznám sa, že pôvodné Fantastické štvorky nie sú žiadne veľdielo, ale vždy mi prišli zábavné a príjemné.	1	Positive
Uthaug každopádne zvláda aj budovanie atmosféry či prácu s charaktermi. Zápletka síce neohromí a nie je núdza o tradičné žánrové klišé, ale je pozitívne, že sa vyhýba nezmyselným dejovým kolotočom a svojou osemdesiatkovou priamočiarosťou je vlastne až sympatická.	1	Positive
Sympatická je aj práca s hernými odkazmi, ktoré až na záverečný fanservis nerušia a svojou prítomnosťou skôr posúvajú dej.	1	Positive
V rámci nedostatkového dobrodružného žánru sa však jedná o prírastok, ktorý si zaslúži palec hore a bezpochyby jedna z najlepších videoherných adaptácií.	1	Positive
Už len presvedčivejší, av rámci možností, dobre hrajúci Aliciou Vikander, či vydarenou technickou stránkou, kde je všetko na svojom mieste, bez problémov predbehne pôvodné dva filmy.	1	Positive
Len záverečná scéna má toľko nefalšovaných emócií, že by teoreticky mala zapôsobiť aj na najväčšieho cynika.	1	Positive
Tých päť oscarových nominácií a mnoho ďalších ocenení je však úplne zaslúžených.	1	Positive
Drljević, ktorý sa okrem réžie podieľal aj na scenári, sa síce nevybral tou ľahšou cestou, ale pochváliť ho možno minimálne za to, že na hrôzy a nezmyselnosť vojny sa mu darí upozorňovať rovnako efektívne, ako snímkam situovaným priamo do centra diania.	1	Positive
Určité kvality v sebe ukrýva tak či tak.	1	Positive
Z „pohodového“ filmu sa následne stáva vojnový blockbuster, ktorý však prekvapivo dobre funguje.	1	Positive
Ako origin film poslúžil dobre, z príbehového hľadiska príjemne odsypa a vy sa v kine nebudete nudiť.	1	Positive
Nie je to však len kvôli deji, prípadne akcii, ktorá je skvelá a ponúka niekoľko pôsobivých scén, veľmi veľkú zásluhu na tom má ústredné duo, čiže Diana a Steve.	1	Positive
Chémia medzi oboma hercami funguje na jedničku, na ich dialógy je radosť pozerať, skrátka takto to má vyzerať.	1	Positive
Hoci nešlo o stávku na istotu, svoju úlohu zvládla. Prechody medzi jednotlivými náladami filmu pôsobia prirodzene, gradácia funguje bez problémov, film ako celok drží pohromade a aj keď sa menšie zakopnutia nájdu, jedná sa o dobre odvedenú prácu.	1	Positive
Film funguje sám o sebe, ponúka dobrú akciu, humor, sympatické postavy, má príjemný vizuál, nechýbajú v ňom emócie, skrátka toto je tá cesta, po ktorej sa treba vydať.	1	Positive
super drahá, príjemne obsadená, jemne temná a desivá rozprávačka pre dospelých, ktorá nenudi. Dan Brown pise skvele	1	Positive
Cranston absolútne famózne. všetku pozornosť strhol na seba. ostatní mu iba sekundovali, hoci aj nadpriemerne. ale pri takom výkone je ťažko vôbec s hercom držať krok. výborné spracovanie dôležitej éry jedného kontroverzného prezidenta.	1	Positive
traja herci, jedna farma, minimalistická hudba. úžasne, výborne postapo. pokiaľ máte radi malé, pomalé filmy, tomuto musíte dať šancu. prekvapí vás a možno aj prevalcuje. tak dobre je to film.	1	Positive
krásne to odsypalo, herci symapticki, pointa fajn a najviac ma zaujal štýl, akým bol film natočený. takže za mňa veľké prekvapenie.	1	Positive
Mňa to nadchlo.	1	Positive
Je fascinujúce sledovať, ako sa dej plynule prelieva z vrstevnatej psychologickej drámy do bizarnej komédie, či dokonca do akčného filmu (s tak výborne natočenými a monumentálne krvavými prestrelkami, že by to mohla byť Jensenova vstupenka do sveta Bondov, Bourneov či Wickov) a celé ich to stále konzistentné a vyvážené.	1	Positive
Neviem ani vyjadriť, ako veľmi ma toto nadchlo.	1	Positive
Asi životná rola Ethana Hawka, ktorý tu famózne a na doraz hrá fanatického bojovníka proti otroctvu Johna Browna v predvečer americkej Občianskej vojny.	1	Positive
Príjemná rodinná "jonesovka", ktorá má hlavu a pätu. Tak trochu moderná verzia Goonies. Trochu dobrodružstvo, humor, krásna príroda, silná porcia havajských mýtov a tradícií.	1	Positive
Veľmi pekný film o archeológii, konkrétne o nájdení anglosaskej pohrebnej lode a pokladu v mohyle Sutton Hoo. Skvelý Ralph Fiennes ako Basil Brown, výborná Carey Mulligan, výborná atmosféra, zlovestné ozveny blížiace sa druhej svetovej. V druhej polovici to síce rozriedi trochu zbytočné vzťahové melodrámy, ale aj tak kvalitka a povinnosť pre všetkých milovníkov histórie, o archeológoch ani nehovo…	1	Positive
Výborné dialógy a skvelí herci, Meryl opäť tak ponorená v úlohe, že ju prestávate vnímať ako „tú herečku Streepovú“ a vnímate len tú postavu. Kvalitka.	1	Positive
Opäť úžasná výtvarná štylizácia, opäť prekrásny príbeh, ktorý je navyše ukrutne napínavý, pretože pri týchto filmoch nemáte istotu, že všetko dobre dopadne. Luxusná vec a jeden z filmov roka	1	Positive
A je to zručne natočené, veľmi pekne to prelína niekoľko časových línií a hlavne je to herecký koncert všetkých hlavných predstaviteľov, predovšetkým famózny Glen Close.	1	Positive
Úplne solídny poľský špionážny film, do ktorého sa produkciu podarilo zohnať Billa Pullmana.	1	Positive
Bravúrne napísaný, skvele zrežírovaný a famózne zahraný starecký dojak. Jeden z najlepších filmov roku.	1	Positive
Dosť múdra scenáristická prácička, ktorá aj vo vlastných nových dejových líniách ctí predlohu. Vizuál je na televízne pomery drahý, triky solídne a rozhodne je to o dosť výpravnejšie ako prvé sezóny GoT	1	Positive
Vizuál jednoducho na jedničku a tie prachy na tom je vidieť.	1	Positive
