# Supplementary material for: Slovak morphological tokenizer using the Byte-Pair Encoding algorithm
Source: PeerJ journal article supplement (doi:10.7717/peerj-cs.2465), 2024-11-19
Supplement: SuppFiles.zip [file kinit_golden_movies.xlsx]

## Sheet:  Sheet1
text	labels	label_texts
But the problem lies in the fact that Jak has up to two hours in cotton, while it could have been cut a little more. I would remove about fifteen minutes from the result so that this genre hybrid could maintain a more pronounced dynamo.	-1	Negative
Unfortunately, the theme remains in the background after the (relatively serious, expectedly cynical and morally repugnant) first half hour.	-1	Negative
A film that is an hour and a half long, while 70 minutes deal with the birth and the last minutes are dedicated to accepting abilities, responsibility for one's actions and the final battle is then rather a bad dream.	-1	Negative
But the film is incredibly boring and unoriginal.	-1	Negative
The film is not strong where it should be and shows a complete organizational and creative failure. It's a bit of a shame because I was really looking forward to the characters.	-1	Negative
However, the same cannot be said about the second of this pair, and the result of this failure, which the Paramount Pictures studio senselessly misled on the then averagely received Tomb Raider: The Angel of Darkness, was a fifteen-year hiatus.	-1	Negative
On the other hand, the abbreviated introduction on the island and the relatively quick transformation of the central character related to it could be criticized.	-1	Negative
In short, being a teenager is not easy, not even for the people around her.	-1	Negative
The civil war in Yugoslavia was one of the particularly bloody conflicts of the late 21st and early 20th centuries.	-1	Negative
However, the overall believability is already more problematic, mainly because of how violently some individual protagonists can react to certain stimuli.	-1	Negative
The biggest problem I have is with the finale of the film itself, which, as in the case of previous films from the DC universe, is outrageously chaotic and seems to have been cut from another film.	-1	Negative
However, the creators did not fit the subject perfectly and obviously wanted to get something more out of it.	-1	Negative
Both Denzel and Viola can play the part all day long, but as for the movie itself, I regret going into it at all. I love conversational and powerful stories, I actually seek them out, but this was a pain	-1	Negative
horrible amateur language. on all sides. acting, directing, screenwriting and especially logical. in this film, everything bad and embarrassing mares from cheap bucks and cuckoos came together.	-1	Negative
otherwise it was terrible, high-pitched bullshit. it was getting on my nerves every minute. literally. his eyes still hurt from the stupid acting and comedic illogicalities.	-1	Negative
I left the cinema absolutely frustrated. if The Revenant wins, it will be the worst film in Oscar history to win the top prize after Birdman.	-1	Negative
I haven't seen a more demented movie in a long time. I give myself a "like" for watching it to the end at all, because this was really something. unfortunately in the negative sense	-1	Negative
regret the lost three hours of my life. please avoid the same mistake.	-1	Negative
A loud and endlessly stupid non-stop romp from a dimension where anything is possible, so Milla Jovovich plays even worse than usual	-1	Negative
Insanely unsympathetic characters in a story that, after two quite dynamic and exciting episodes, turns into an annoyingly chatty and whiny soap opera	-1	Negative
so it has an insanely stupid plot with a sort of live version of arabela's ring, blah blah dialogue, confused leads, desperate villains and very poorly shot action scenes with cheap gimmicks.	-1	Negative
I haven't seen such a stupid and dysfunctional movie in a long time.	-1	Negative
No, it's not a good movie, it's a maddeningly boring and empty patchwork that painfully misses what was obviously supposed to be the main point - that is, to capture some kind of turning point or relationship in Mank's life that led to the writing of Citizen Kane.	-1	Negative
Actually, it didn't really appeal to me - neither as animated visuals, nor as a story. It could have been something like a realistic Inglorious Basterds, but the plot is scattered, episodic, fails to draw in and connect the viewer with the characters enough, it does not have the epic thrust	-1	Negative
It's not a very good movie (neither in terms of setting nor script)	-1	Negative
Nothing extra really, I just kept an eye on it to keep track of this historical stuff	-1	Negative
this was seriously not possible anymore, I was even thinking about waste	-1	Negative
This is a wildly botched scripted stew where I couldn't figure out who was who, what the hell was going on, where the virtual reality started and ended, who was her character's new body from season 1... and why would I he should have looked at it	-1	Negative
for me the most stupid film of this year	-1	Negative
it's just a shame that the creators drop hints of "shocking" points all too obviously. And Worthington doesn't give it much acting.	-1	Negative
This really failed miserably. The whole plot is a patchwork with a bunch of illogical fails and idiotic abbreviations.	-1	Negative
The plot is B-grade, there is no tension, there is little action, the villains are weak, even the old school feeling from the unit is gone.	-1	Negative
this is a desperation that they obviously didn't enjoy. As if they were already going straight to the set with the fact that they are filming a pointless film that is in no way comparable to the original film.	-1	Negative
couple of decent scares with a boring script and unsympathetic actors.	-1	Negative
It has a completely stupid story, the whole plot is monstrous, the setting in the historical context is unnecessary and dysfunctional. The entire film has no hint of perspective, let alone humor	-1	Negative
Sure, it's hard to expect a good story from a computer game adaptation, but this is the most boring fantasy blah blah imaginable.	-1	Negative
Some scenes are completely wrong and I can't quite decide if it's the actors or the direction or both.	-1	Negative
Hvorecký's mysterious period detective turned into a stupid and convulsive "comedy" full of terrible "jokes" and unbearable actors (with a disgustingly frizzy Macháček in the lead).	-1	Negative
The script is not completely useless, but the filming is really lifeless and the actors all the time pretend that they are participating in this project as a punishment.	-1	Negative
nowadays you also have the merit of digital subscription services to choose from dozens and dozens of different films. Really, you can find almost anything from any genre	0	Neutral
Instead of traveling the world and discovering tombs, he tries to live a normal life in London, refusing on principle to take over the company of his father, who mysteriously disappeared seven years ago.	0	Neutral
Once in a while, a film like Lady Bird appears on the scene, which does not try to point out the problems of today's world, does not force the viewer to think about its injustice, yet it cannot be said that it does not hide any depth.	0	Neutral
He profiled himself more as a documentary filmmaker and dedicated his debut Karneval from 2006 to the topic of the illegal expulsion of Bosnian refugees from Montenegro.	0	Neutral
Since this is Wonder Woman's first solo film, the heroine must first be introduced. Although we have met this character before, we did not know much about her past.	0	Neutral
Patty Jenkins directed the first female-led superhero film.	0	Neutral
The whole thing takes place in several time planes that are even decades apart, which makes it possible to process individual stories	0	Neutral
that's why I'm at least happy when something new comes under my hands (or in front of my eyes?).	1	Positive
After all, a creative pen can surprise. Not once, not twice, but repeatedly and effectively across the entire frame.	1	Positive
The queen of acting is undoubtedly Rosamund Pike, who is ten levels above any other actor or actress in the film.	1	Positive
Primarily, the attention is focused on the character of Rosamund, and in specific moments she is seconded by Dinklage. And it surprisingly works.	1	Positive
Like cotton wool is an extremely entertaining neo-thriller with relevant content value, adequate technical processing, an excellent Rosamund and a current social impact, for which statuettes or a minimum nomination are traditionally given (J. Peele's last two films).	1	Positive
The script is relatively clever, rightly unpleasant, perverse, and basically you won't find a single character in it that you want or can relate to	1	Positive
I'll admit that the original Fantastic Four are no masterpiece, but I always found them entertaining and enjoyable.	1	Positive
In any case, Uthaug also manages to build an atmosphere or work with characters. Although the plot does not amaze and there is no shortage of traditional genre clichés, it is positive that it avoids meaningless plot twists and is actually quite likable with its 1980s directness.	1	Positive
The work with the game references is also nice, they do not interfere with the final fanservice and rather advance the story with their presence.	1	Positive
However, it's a thumbs-up addition to the lackluster adventure genre, and without a doubt one of the best video game adaptations out there.	1	Positive
If only Alicia Vikander, who is more convincing and within the scope of possibilities, plays well, or with a successful technical side where everything is in its place, it will overtake the original two films without any problems.	1	Positive
Only the final scene has so much genuine emotion that, in theory, it should impress even the biggest cynic.	1	Positive
However, the five Oscar nominations and many other awards are fully deserved.	1	Positive
Drljević, who, in addition to directing, also participated in the script, did not choose the easy path, but he can be praised at least for the fact that he manages to draw attention to the horrors and senselessness of war as effectively as the pictures located directly in the center of the action.	1	Positive
He hides certain qualities in himself one way or another.	1	Positive
The "comfortable" movie subsequently becomes a war blockbuster, which works surprisingly well.	1	Positive
As an origin film, it served well, from a story point of view, it flows pleasantly and you will not be bored in the cinema.	1	Positive
However, it is not only because of the plot, or the action, which is great and offers several impressive scenes, the central duo, Diana and Steve, have a lot of credit for this.	1	Positive
The chemistry between the two actors works perfectly, their dialogues are a joy to watch, in short, this is how it should look.	1	Positive
Although it wasn't a safe bet, she got the job done. The transitions between the individual moods of the film seem natural, the gradation works without problems, the film as a whole holds together and even if there are minor stumbling blocks, it is a job well done.	1	Positive
The film works by itself, it offers good action, humor, likeable characters, it has pleasant visuals, there is no shortage of emotions in it, in short, this is the way to go.	1	Positive
a super expensive, pleasantly cast, subtly dark and scary adult story that never bores. Dan Brown writes brilliantly	1	Positive
Cranston absolutely amazing. drew all attention to himself. the others only seconded him, albeit above average. but with such a performance it is difficult to keep up with the actor at all. an excellent treatment of an important era of a controversial president.	1	Positive
three actors, one farm, minimalist music. wonderful, excellent attitude. if you like small, slow movies, you have to give this one a chance. it will surprise you and maybe even overwhelm you. so good it's a movie.	1	Positive
it poured out beautifully, the actors were sympathetic, the point was fine and I was most interested in the style in which the film was shot. so a big surprise for me.	1	Positive
It excited me.	1	Positive
It is fascinating to watch how the plot smoothly flows from a layered psychological drama into a bizarre comedy, or even into an action film (with such excellently shot and monumentally bloody shootouts that it could be Jensen's ticket to the world of Bond, Bourne or Wick) and their entire it still consistent and balanced.	1	Positive
I can't even express how excited I am about this.	1	Positive
Probably the role of a lifetime for Ethan Hawke, who here famously plays the fanatical anti-slavery fighter John Brown on the eve of the American Civil War.	1	Positive
A pleasant family "jonesovka" that has a head and a heel. Sort of a modern version of the Goonies. A little adventure, humor, beautiful nature, a strong portion of Hawaiian myths and traditions.	1	Positive
very nice film about archaeology, specifically the discovery of an Anglo-Saxon burial boat and treasure in the Sutton Hoo barrow. Great Ralph Fiennes as Basil Brown, excellent Carey Mulligan, excellent atmosphere, ominous echoes approaching the Second World War. In the second half, it dilutes the somewhat unnecessary relationship melodramas, but it is still quality and a must for all history love…	1	Positive
Excellent dialogues and great actors, Meryl again so immersed in the role that you stop seeing her as "that Streep actress" and just see the character. Quality.	1	Positive
Again, amazing art stylization, again a beautiful story, which is also cruelly exciting, because with these films you are not sure that everything will turn out well. A luxury item and one of the films of the year	1	Positive
And it's skilfully shot, it intertwines several timelines very nicely, and most importantly, it's an acting concert by all the main actors, especially the famous Glen Close.	1	Positive
A completely solid Polish spy film, in which the production managed to get Bill Pullman.	1	Positive
Brilliantly written, brilliantly directed and famously acted old milkman. One of the best movies of the year.	1	Positive
Quite a clever screenwriter who honors the original even in her own new storylines. The visuals are expensive by TV standards, the gimmicks are solid and it's definitely a lot more epic than the first seasons of GoT	1	Positive
The visuals are simply top notch and you can see the money on it.	1	Positive
