# Supplementary material for: Slovak morphological tokenizer using the Byte-Pair Encoding algorithm
Source: PeerJ journal article supplement (doi:10.7717/peerj-cs.2465), 2024-11-19
Supplement: SuppFiles.zip [file kinit_golden_stress.xlsx]

## Sheet:  Sheet1
text	labels	label_texts
and that's why I don't like cars.	-1	Negative
and that's why I don't like pits.	-1	Negative
and that's why I don't like peasants.	-1	Negative
But otherwise it is not comfortable.	-1	Negative
The quality will deteriorate rapidly.	-1	Negative
Which bothers me quite a bit.	-1	Negative
Which bothers me a lot.	-1	Negative
It bothers me quite a bit.	-1	Negative
It's quite annoying.	-1	Negative
It bothers me quite significantly.	-1	Negative
Passwords are not secure.	-1	Negative
Passwords are dangerously simple.	-1	Negative
Passwords are dangerous.	-1	Negative
Otherwise, it is not comfortable.	-1	Negative
Otherwise, it is not comfortable at all.	-1	Negative
It's really stupid.	-1	Negative
It's really stupidly contrived.	-1	Negative
It's a really stupid idea.	-1	Negative
It's really dangerous.	-1	Negative
It's really very stupidly made up.	-1	Negative
He is very ugly, but she doesn't like him either.	-1	Negative
He is very ugly, but she does not like him.	-1	Negative
It has a lower resistance to scratches.	-1	Negative
I don't like shopping.	-1	Negative
I don't like the way of expression.	-1	Negative
I don't like that approach.	-1	Negative
It can be a slight obstacle.	-1	Negative
The camera annoys me the most.	-1	Negative
The slow camera annoys me the most.	-1	Negative
The cold camera annoys me the most.	-1	Negative
He was not very handsome.	-1	Negative
The disease is the retention of grease.	-1	Negative
They hate morning walks.	-1	Negative
They hate all medicines.	-1	Negative
It is not among the best on the market.	-1	Negative
He hates getting up in the morning.	-1	Negative
There is nothing nice there.	-1	Negative
She is not pretty.	-1	Negative
It's not always ideal.	-1	Negative
It's not always perfect.	-1	Negative
She is not very pretty.	-1	Negative
She is not very pretty.	-1	Negative
He's pretty stupid.	-1	Negative
He is pretty ugly.	-1	Negative
Dislikes quite a bit.	-1	Negative
After that, the quality will deteriorate rapidly.	-1	Negative
They are bad to work with.	-1	Negative
Frames have gotten significantly worse.	-1	Negative
More negative than positive.	-1	Negative
Processing could have been better.	-1	Negative
The stability of the stand could have been better.	-1	Negative
That computer is terribly ugly.	-1	Negative
That was really disappointing.	-1	Negative
That was a big disappointment.	-1	Negative
That's a stupid moron.	-1	Negative
That's pretty stupid.	-1	Negative
That's some pretty crap.	-1	Negative
That's a nice moron.	-1	Negative
This is quite impractical during the pandemic.	-1	Negative
But the location of the power button bothers me a bit.	-1	Negative
It no longer meets current standards.	-1	Negative
This is very disturbing.	-1	Negative
More negative than positive.	-1	Negative
But endurance is its minus.	-1	Negative
Durability is his minus.	-1	Negative
However, endurance is its minus.	-1	Negative
Durability is its minus.	-1	Negative
that's why I like cars.	1	Positive
and that's why I like jams.	1	Positive
and that's why I like peasants.	1	Positive
Which I don't really mind.	1	Positive
what I have to praise, however, is that the stand is solid.	1	Positive
The hardware buttons are pleasantly large.	1	Positive
She is pretty.	1	Positive
She is very pretty.	1	Positive
It is even more beautifully thought out.	1	Positive
It is really safe.	1	Positive
It is really very well thought out.	1	Positive
It is a very nice car. I like him. I like the car.	1	Positive
She is absolutely perfect.	1	Positive
She is very pretty.	1	Positive
We have no reservations about the OS itself.	1	Positive
I really can't fault the sound quality.	1	Positive
I have nothing to complain about the sound quality.	1	Positive
They also have an attractive design.	1	Positive
He loves all foods.	1	Positive
The best laptops at the best prices.	1	Positive
The best laptops at the best prices.	1	Positive
The best laptops at great prices.	1	Positive
The best laptops at traditional prices.	1	Positive
We have nothing to complain about.	1	Positive
We have nothing to complain about.	1	Positive
She's not exactly ugly.	1	Positive
It doesn't matter much.	1	Positive
The image is more beautiful, better quality and better.	1	Positive
I like the control center.	1	Positive
Really excellent in my opinion.	1	Positive
He likes it quite a bit.	1	Positive
They are excellent to work with.	1	Positive
It works reliably and productively.	1	Positive
The most suitable for you.	1	Positive
For your perfect experience.	1	Positive
Frames have improved significantly.	1	Positive
I had no problem with that.	1	Positive
More positive than negative.	1	Positive
I didn't have a single problem.	1	Positive
I didn't have a single problem.	1	Positive
Brushes work them in beautifully.	1	Positive
A phone with high resistance to destruction.	1	Positive
The most suitable gift for you.	1	Positive
I don't really regret this purchase, on the contrary, I'm glad.	1	Positive
That was really a surprise.	1	Positive
This is very practical during the pandemic.	1	Positive
This is a great victory.	1	Positive
have absolutely no reservations about the performance.	1	Positive
It doesn't matter much.	1	Positive
A suitably chosen processor and there is also a disk.	1	Positive
It is excellent that the car goes on the road.	1	Positive
