# Supplementary material for: Slovak morphological tokenizer using the Byte-Pair Encoding algorithm
Source: PeerJ journal article supplement (doi:10.7717/peerj-cs.2465), 2024-11-19
Supplement: SuppFiles.zip [file kinit_golden_stress.xlsx]

## Sheet:  Sheet1
text	labels	label_texts
a preto nemám rád autá.	-1	Negative
a preto nemám rád jamy.	-1	Negative
a preto nemám rád roľníkov.	-1	Negative
Ale inak to pohodlné nie je.	-1	Negative
Bude kvalita rapídne zhoršovať.	-1	Negative
Čo mi dosť prekáža.	-1	Negative
Čo mi veľmi vadí.	-1	Negative
Dosť mi to vadí.	-1	Negative
Dosť to vadí.	-1	Negative
Dosť výrazne vadí.	-1	Negative
Heslá nie sú bezpečné.	-1	Negative
Heslá sú nebezpečne jednoduché.	-1	Negative
Heslá sú nebezpečné.	-1	Negative
Inak to pohodlné nie je.	-1	Negative
Inak to pohodlné vôbec nie je.	-1	Negative
Je to naozaj hlúpe.	-1	Negative
Je to naozaj hlúpo vymyslené.	-1	Negative
Je to naozaj hlúpy nápad.	-1	Negative
Je to skutočne nebezpečné.	-1	Negative
Je to naozaj veľmi hlúpo vymyslené.	-1	Negative
Je veľmi škaredý, ale ani jej sa nepáči.	-1	Negative
Je veľmi škaredý, ale jej sa nepáči.	-1	Negative
Má nižšiu odolnosť voči škrabancom.	-1	Negative
Mne sa nepáči nakupovanie.	-1	Negative
Mne sa nepáči spôsob vyjadrovania.	-1	Negative
Mne sa nepáči ten prístup.	-1	Negative
Môže byť mierna prekážka.	-1	Negative
Najviac ma štve fotoaparát.	-1	Negative
Najviac ma štve pomalý fotoaparát.	-1	Negative
Najviac ma štve studený fotoaparát.	-1	Negative
Nebol veľmi pekný.	-1	Negative
Neduhom je zachytávanie mastnoty.	-1	Negative
Nenávidia ranné vychádzky.	-1	Negative
Nenávidia všetky lieky.	-1	Negative
Nepatrí medzi to najlepšie na trhu.	-1	Negative
Neznáša ranné vstávanie.	-1	Negative
Nič pekné tam nie je.	-1	Negative
Nie je pekná.	-1	Negative
Nie je to vždy ideálne.	-1	Negative
Nie je to vždy úplne ideálne.	-1	Negative
Nie je veľmi pekná.	-1	Negative
Nie je práve pekná.	-1	Negative
On je pekne hlúpy.	-1	Negative
On je pekne škaredý.	-1	Negative
Pomerne dosť nepáči.	-1	Negative
Potom sa kvalita bude rapídne zhoršovať.	-1	Negative
Pracuje sa s nimi zle.	-1	Negative
Rámčeky sa výrazne zhoršili.	-1	Negative
Skôr negatívne ako pozitívne.	-1	Negative
Spracovanie mohlo byť lepšie.	-1	Negative
Stabilita stojana mohla byť lepšia.	-1	Negative
Ten počítač je strašne škaredý.	-1	Negative
To bolo skutočne sklamanie.	-1	Negative
To bolo veľké sklamanie.	-1	Negative
To je hlúpy debil.	-1	Negative
To je pekná hlúposť.	-1	Negative
To je pekná hovadina.	-1	Negative
To je pekný debil.	-1	Negative
Toto je v čase pandémie dosť nepraktické.	-1	Negative
Trochu mi ale prekáža umiestnenie zapínacieho tlačidla.	-1	Negative
Už nezodpovedá súčasným štandardom.	-1	Negative
To veľmi prekáža.	-1	Negative
Viac negatívne ako pozitívne.	-1	Negative
Výdrž je ale jeho mínusom.	-1	Negative
Výdrž je jeho mínusom.	-1	Negative
Výdrž je však jeho mínusom.	-1	Negative
Výdrž je zase jeho mínusom.	-1	Negative
preto mám rád autá.	1	Positive
a preto mám rád jamy.	1	Positive
a preto mám rád roľníkov.	1	Positive
Čo mi veľmi nevadí.	1	Positive
čo však musím pochváliť, že je stojan pevný.	1	Positive
Hardvérové tlačidlá sú príjemne veľké.	1	Positive
Je pekná.	1	Positive
Je strašne pekná.	1	Positive
Je to ešte krajšie vymyslené.	1	Positive
Je to skutočne bezpečné.	1	Positive
Je to naozaj veľmi pekne vymyslené.	1	Positive
Je to veľmi pekné auto. Mám ho rád. Páči sa mi to auto.	1	Positive
Je úplne dokonalá.	1	Positive
Je veľmi pekná.	1	Positive
K samotnému OS nemáme výhrady.	1	Positive
Kvalite zvuku naozaj nemám čo vyčítať.	1	Positive
Kvalite zvuku nemám čo vyčítať.	1	Positive
Majú tiež príťažlivý design.	1	Positive
Miluje všetky jedlá.	1	Positive
Najlepšie notebooky za lepšie ceny.	1	Positive
Najlepšie notebooky za najvýhodnejšie ceny.	1	Positive
Najlepšie notebooky za skvelé ceny.	1	Positive
Najlepšie notebooky za tradičné ceny.	1	Positive
Nemáme až tak čo vytknúť.	1	Positive
Nemáme čo vytknúť.	1	Positive
Nie je práve škaredá.	1	Positive
Nijako výrazne nevadí.	1	Positive
Obraz je krajší, kvalitnejší a lepší.	1	Positive
Páči sa mi ovládacie centrum.	1	Positive
Podľa môjho názoru naozaj výborný.	1	Positive
Pomerne dosť páči.	1	Positive
Pracuje sa s nimi výborne.	1	Positive
Pracuje spoľahlivo a produktívne.	1	Positive
Pre vás najvhodnejšie.	1	Positive
Pre váš perfektný zážitok.	1	Positive
Rámčeky sa výrazne zlepšili.	1	Positive
S tým som problém nemal.	1	Positive
Skôr pozitívne ako negatívne.	1	Positive
Som nemal ani jeden jediný problém.	1	Positive
som nemal ani jeden problém.	1	Positive
Štetce ich krásne zapracujú.	1	Positive
Telefón s vysokou odolnosťou voči zničeniu.	1	Positive
Ten pre vás najvhodnejší darček.	1	Positive
Tento nákup naozaj neľutujem, naopak som rada.	1	Positive
To bolo skutočne prekvapenie.	1	Positive
To je v čase pandémie veľmi praktické.	1	Positive
Toto je veľké víťazstvo.	1	Positive
V rámci výkonu nemám absolútne žiadne výhrady.	1	Positive
Veľmi to nevadí.	1	Positive
Vhodne zvolený procesor a nechýba ani disk.	1	Positive
Výborné je, že auto ide po ceste.	1	Positive
