# Supplementary material for: Slovak morphological tokenizer using the Byte-Pair Encoding algorithm
Source: PeerJ journal article supplement (doi:10.7717/peerj-cs.2465), 2024-11-19
Supplement: SuppFiles.zip [file statistics.xlsx]

## Sheet: Hárok1
	count	mean	std	min	25%	50%	75%	max
Word count	500000	61.5661	20.9817	18	46	56	72	210
Word root count	500000	42.2013	15.836	7	31	38	50	154
SB TT	500000	105.854	40.0135	64	76	93	123	377
SB AT/W	500000	1.29221	0.130152	1	1.1967	1.275	1.3696	2.7083
SB AT/RW	500000	1.27647	0.128979	1	1.1842	1.2609	1.3529	2.2353
SB ATL	500000	4.51201	0.517591	3.1404	4.1346	4.4538	4.8267	7.9318
SB ARTL	500000	5.35572	0.647503	3.4318	4.8947	5.2985	5.7619	8.9714
SB CT	500000	0.904558	0.0637046	0.4545	0.8684	0.9143	0.9512	1
pureBPE TT	500000	100.097	38.206	46	72	88	117	350
pureBPE AT/W	500000	1.21525	0.109573	1	1.1356	1.2	1.2785	2.1667
pureBPE AT/RW	500000	1.18733	0.103913	1	1.1111	1.1739	1.25	2
pureBPE ATL	500000	4.79474	0.563126	3.0253	4.3861	4.74	5.1475	8.1163
pureBPE ARTL	500000	5.74926	0.681672	3.5909	5.2603	5.6939	6.1887	9.4
pureBPE CT	500000	0.930845	0.0530264	0.4762	0.9	0.9394	0.9697	1
SKMT TT	500000	103.282	39.5038	46	74	91	120	359
SKMT AT/W	500000	1.27045	0.121781	1	1.1818	1.2549	1.3409	2.3514
SKMT AT/RW	500000	1.22864	0.101145	1	1.1566	1.2195	1.2903	2.0606
SKMT ATL	500000	4.5876	0.527572	2.9048	4.2069	4.5385	4.9167	7.587
SKMTARTL	500000	5.55083	0.632193	3.4595	5.0984	5.4919	5.95	9.1316
SKMT CT	500000	0.996964	0.0095731	0.8065	1	1	1	1
